# Supplementary material for: Immuno-oncological Efficacy of RXDX-106, a Novel TAM (TYRO3, AXL, MER) Family Small-Molecule Kinase Inhibitor
Source: Oxford University Press journal article supplement (doi:10.1158/0008-5472.can-18-2022), 2019-02-05
Supplement: 00085472can182022-sup-204554_2_supp_5216203_pm4b7s.xlsx [file 00085472can182022-sup-204554_2_supp_5216203_pm4b7s.xlsx]

## Sheet: day3_Top100.UP.DEGs
Table S1a. Genes significantly differentially upregulated between Vehicle and RXDX-106 treated MC83 mice at day 3. Statistical significance was defined as |log2FC|>1, FDR<0.01 and FPKM>1 in 2 or more samples within the contrasting groups. 4/29 (13.8%) genes significantly upregulated at day 3 annotate to an immunological GO term as indicated in the yellow cells.
SYMBOL	REFSEQ	logFC	FDR	GO.ID
Megf6	NM_001162977	1.79138	1.65082e-17	GO:0008150 (biological_process)
Cdh26	NM_198656	1.68783	1.02087e-14	GO:0007155 (cell adhesion), GO:0007156 (homophilic cell adhesion via plasma memb...), GO:0008150 (biological_process), GO:0022610 (biological adhesion), GO:0098609 (cell-cell adhesion), GO:0098742 (cell-cell adhesion via plasma-membrane a...)
Gxylt2	NM_198612	1.15555	1.37838e-14	GO:0006464 (cellular protein modification process), GO:0006486 (protein glycosylation), GO:0006493 (protein O-linked glycosylation), GO:0008150 (biological_process), GO:0008152 (metabolic process), GO:0009058 (biosynthetic process), GO:0009059 (macromolecule biosynthetic process), GO:0009100 (glycoprotein metabolic process), GO:0009101 (glycoprotein biosynthetic process), GO:0009987 (cellular pro…
Ogn	NM_008760	1.78924	1.70399e-14	GO:0000902 (cell morphogenesis), GO:0000904 (cell morphogenesis involved in different...), GO:0007275 (multicellular organism development), GO:0007399 (nervous system development), GO:0007409 (axonogenesis), GO:0008150 (biological_process), GO:0009653 (anatomical structure morphogenesis), GO:0009987 (cellular process), GO:0016043 (cellular component organization), GO:0022008 (neurogenesis), GO:00…
Fmod	NM_021355	2.01871	5.46086e-13	NA
Nckap5	NM_172484	1.12847	2.99463e-12	GO:0008150 (biological_process)
Prokr1	NM_021381	1.05641	3.1409e-12	GO:0001568 (blood vessel development), GO:0001944 (vasculature development), GO:0003008 (system process), GO:0003013 (circulatory system process), GO:0006915 (apoptotic process), GO:0007154 (cell communication), GO:0007165 (signal transduction), GO:0007186 (G-protein coupled receptor signaling pat...), GO:0007218 (neuropeptide signaling pathway), GO:0007267 (cell-cell signaling), GO:0007268 (chem…
Daam2	NM_001008231	1.37344	1.08743e-11	GO:0006996 (organelle organization), GO:0007010 (cytoskeleton organization), GO:0007275 (multicellular organism development), GO:0007368 (determination of left/right symmetry), GO:0007389 (pattern specification process), GO:0008150 (biological_process), GO:0009799 (specification of symmetry), GO:0009855 (determination of bilateral symmetry), GO:0009987 (cellular process), GO:0016043 (cellular com…
Mylk	NM_139300	1.03354	1.37183e-11	GO:0001568 (blood vessel development), GO:0001944 (vasculature development), GO:0003008 (system process), GO:0003012 (muscle system process), GO:0006464 (cellular protein modification process), GO:0006468 (protein phosphorylation), GO:0006793 (phosphorus metabolic process), GO:0006796 (phosphate-containing compound metabolic ...), GO:0006810 (transport), GO:0006811 (ion transport), GO:0006812 (ca…
Islr	NM_012043	1.34516	9.96614e-11	GO:0007155 (cell adhesion), GO:0008150 (biological_process), GO:0022610 (biological adhesion)
Slc14a2	NM_030683	1.77363	5.03107e-10	GO:0006810 (transport), GO:0008150 (biological_process), GO:0015840 (urea transport), GO:0019755 (one-carbon compound transport), GO:0042886 (amide transport), GO:0044699 (single-organism process), GO:0044765 (single-organism transport), GO:0051179 (localization), GO:0051234 (establishment of localization), GO:0055085 (transmembrane transport), GO:0071702 (organic substance transport), GO:0071705…
Lrrc15	NM_028973	1.38707	3.13654e-09	GO:0001932 (regulation of protein phosphorylation), GO:0001933 (negative regulation of protein phosphory...), GO:0006464 (cellular protein modification process), GO:0006468 (protein phosphorylation), GO:0006469 (negative regulation of protein kinase ac...), GO:0006793 (phosphorus metabolic process), GO:0006796 (phosphate-containing compound metabolic ...), GO:0006928 (movement of cell or subcellu…
Tmem44	NM_172614	1.08713	3.66592e-09	GO:0008150 (biological_process)
Syt13	NM_030725	1.60856	6.33176e-08	GO:0001505 (regulation of neurotransmitter levels), GO:0006810 (transport), GO:0006836 (neurotransmitter transport), GO:0006887 (exocytosis), GO:0006906 (vesicle fusion), GO:0006996 (organelle organization), GO:0007154 (cell communication), GO:0007267 (cell-cell signaling), GO:0007268 (chemical synaptic transmission), GO:0007269 (neurotransmitter secretion), GO:0008150 (biological_process), GO:00…
Sohlh1	NM_001001714	2.33257	1.01276e-07	GO:0000003 (reproduction), GO:0001541 (ovarian follicle development), GO:0003006 (developmental process involved in reprod...), GO:0006139 (nucleobase-containing compound metabolic...), GO:0006351 (transcription, DNA-templated), GO:0006355 (regulation of transcription, DNA-templat...), GO:0006357 (regulation of transcription from RNA pol...), GO:0006366 (transcription from RNA polymerase II pro..…
Mfap4	NM_029568	1.30413	2.14863e-06	GO:0007155 (cell adhesion), GO:0008150 (biological_process), GO:0008152 (metabolic process), GO:0009314 (response to radiation), GO:0009411 (response to UV), GO:0009416 (response to light stimulus), GO:0009628 (response to abiotic stimulus), GO:0009650 (UV protection), GO:0009987 (cellular process), GO:0010224 (response to UV-B), GO:0010712 (regulation of collagen metabolic process), GO:0016043 (…
Cstad	NM_030137	1.30609	3.6443e-06	GO:0006996 (organelle organization), GO:0007005 (mitochondrion organization), GO:0007006 (mitochondrial membrane organization), GO:0008150 (biological_process), GO:0009987 (cellular process), GO:0016043 (cellular component organization), GO:0044699 (single-organism process), GO:0044763 (single-organism cellular process), GO:0044802 (single-organism membrane organization), GO:0061024 (membrane org…
Slc13a3	NM_054055	1.39639	8.11708e-06	GO:0006810 (transport), GO:0006811 (ion transport), GO:0006812 (cation transport), GO:0006814 (sodium ion transport), GO:0006820 (anion transport), GO:0006835 (dicarboxylic acid transport), GO:0006865 (amino acid transport), GO:0008150 (biological_process), GO:0015672 (monovalent inorganic cation transport), GO:0015711 (organic anion transport), GO:0015740 (C4-dicarboxylate transport), GO:0015800…
Best1	NM_011913	1.34229	1.02469e-05	GO:0003008 (system process), GO:0006810 (transport), GO:0006811 (ion transport), GO:0006812 (cation transport), GO:0006816 (calcium ion transport), GO:0006820 (anion transport), GO:0006821 (chloride transport), GO:0007600 (sensory perception), GO:0007601 (visual perception), GO:0008150 (biological_process), GO:0009314 (response to radiation), GO:0009416 (response to light stimulus), GO:0009581 (d…
Klrg1	NM_016970	1.06507	1.89553e-05	GO:0002376 (immune system process), GO:0006950 (response to stress), GO:0006952 (defense response), GO:0006955 (immune response), GO:0007154 (cell communication), GO:0007165 (signal transduction), GO:0007166 (cell surface receptor signaling pathway), GO:0008150 (biological_process), GO:0009987 (cellular process), GO:0023052 (signaling), GO:0044699 (single-organism process), GO:0044700 (single org…
C1qtnf3	NM_030888	1.15783	3.86488e-05	GO:0000165 (MAPK cascade), GO:0001816 (cytokine production), GO:0001817 (regulation of cytokine production), GO:0001818 (negative regulation of cytokine producti...), GO:0001819 (positive regulation of cytokine producti...), GO:0001932 (regulation of protein phosphorylation), GO:0001934 (positive regulation of protein phosphory...), GO:0002790 (peptide secretion), GO:0002791 (regulation of peptid…
Calml4	NM_138304	1.02258	0.000155059	NA
Plac1	NM_019538	1.25739	0.000351394	GO:0000003 (reproduction), GO:0001701 (in utero embryonic development), GO:0001890 (placenta development), GO:0001892 (embryonic placenta development), GO:0003006 (developmental process involved in reprod...), GO:0007275 (multicellular organism development), GO:0008150 (biological_process), GO:0009790 (embryo development), GO:0009792 (embryo development ending in birth or eg...), GO:0009888 (tiss…
Nts	NM_024435	1.35304	0.000662954	GO:0003008 (system process), GO:0003013 (circulatory system process), GO:0003018 (vascular process in circulatory system), GO:0007610 (behavior), GO:0007611 (learning or memory), GO:0007612 (learning), GO:0007632 (visual behavior), GO:0008015 (blood circulation), GO:0008150 (biological_process), GO:0008306 (associative learning), GO:0008542 (visual learning), GO:0009314 (response to radiation), G…
Gzma	NM_010370	1.11601	0.000785885	GO:0006139 (nucleobase-containing compound metabolic...), GO:0006259 (DNA metabolic process), GO:0006508 (proteolysis), GO:0006725 (cellular aromatic compound metabolic pro...), GO:0006807 (nitrogen compound metabolic process), GO:0006915 (apoptotic process), GO:0008150 (biological_process), GO:0008152 (metabolic process), GO:0008219 (cell death), GO:0009056 (catabolic process), GO:0009057 (macro…
Eln	NM_007925	1.29055	0.00122476	GO:0006461 (protein complex assembly), GO:0006996 (organelle organization), GO:0007010 (cytoskeleton organization), GO:0007015 (actin filament organization), GO:0007275 (multicellular organism development), GO:0007517 (muscle organ development), GO:0007519 (skeletal muscle tissue development), GO:0008064 (regulation of actin polymerization or de...), GO:0008150 (biological_process), GO:0008154 (a…
Zcchc5	NM_199468	1.11995	0.00140436	GO:0008150 (biological_process)
Clec4b1	NM_027218	1.01357	0.00228735	GO:0006810 (transport), GO:0006811 (ion transport), GO:0006812 (cation transport), GO:0006816 (calcium ion transport), GO:0006873 (cellular ion homeostasis), GO:0006874 (cellular calcium ion homeostasis), GO:0006875 (cellular metal ion homeostasis), GO:0007204 (positive regulation of cytosolic calcium...), GO:0008150 (biological_process), GO:0009987 (cellular process), GO:0010522 (regulation of c…
Col8a2	NM_199473	1.13149	0.00326635	GO:0001525 (angiogenesis), GO:0001568 (blood vessel development), GO:0001654 (eye development), GO:0001944 (vasculature development), GO:0007155 (cell adhesion), GO:0007275 (multicellular organism development), GO:0007423 (sensory organ development), GO:0008150 (biological_process), GO:0008283 (cell proliferation), GO:0009653 (anatomical structure morphogenesis), GO:0009887 (animal organ morphoge…

## Sheet: day5_Top100.UP.DEGs
Table S1b. The top 100 most significantly differentially upregulated genes between Vehicle and RXDX-106 treated MC83 mice at day 5 (ranked by FDR). Statistical significance was defined as |log2FC|>1, FDR<0.01 and FPKM>1 in 2 or more samples within the contrasting groups. 55/100 (55%) of the most significantly upregulated genes at day 5 annotate to an immunological GO term as indicated in the yell…
SYMBOL	REFSEQ	logFC	FDR	GO.ID
Adgre1	NM_010130	1.53121	9.14569e-20	GO:0002250 (adaptive immune response), GO:0002376 (immune system process), GO:0006955 (immune response), GO:0007154 (cell communication), GO:0007165 (signal transduction), GO:0007166 (cell surface receptor signaling pathway), GO:0007186 (G-protein coupled receptor signaling pat...), GO:0008150 (biological_process), GO:0009987 (cellular process), GO:0023052 (signaling), GO:0044699 (single-organism…
Marcks	NM_008538	1.02775	9.14569e-20	GO:0006461 (protein complex assembly), GO:0006996 (organelle organization), GO:0007010 (cytoskeleton organization), GO:0007015 (actin filament organization), GO:0008150 (biological_process), GO:0009987 (cellular process), GO:0016043 (cellular component organization), GO:0022607 (cellular component assembly), GO:0030029 (actin filament-based process), GO:0030036 (actin cytoskeleton organization), …
Ly9	NM_008534	1.19859	4.05119e-18	GO:0001775 (cell activation), GO:0001816 (cytokine production), GO:0001817 (regulation of cytokine production), GO:0001819 (positive regulation of cytokine producti...), GO:0002250 (adaptive immune response), GO:0002252 (immune effector process), GO:0002263 (cell activation involved in immune respo...), GO:0002285 (lymphocyte activation involved in immune...), GO:0002286 (T cell activation involv…
Rab3il1	NM_144538	1.31131	1.43875e-17	GO:0006810 (transport), GO:0008104 (protein localization), GO:0008150 (biological_process), GO:0015031 (protein transport), GO:0015833 (peptide transport), GO:0033036 (macromolecule localization), GO:0042886 (amide transport), GO:0045184 (establishment of protein localization), GO:0051179 (localization), GO:0051234 (establishment of localization), GO:0071702 (organic substance transport), GO:0071…
Pltp	NM_011125	1.13793	7.43076e-17	GO:0006629 (lipid metabolic process), GO:0006766 (vitamin metabolic process), GO:0006775 (fat-soluble vitamin metabolic process), GO:0006810 (transport), GO:0006869 (lipid transport), GO:0006928 (movement of cell or subcellular componen...), GO:0008150 (biological_process), GO:0008152 (metabolic process), GO:0009058 (biosynthetic process), GO:0009110 (vitamin biosynthetic process), GO:0009987 (ce…
Tmem86a	NM_026436	1.04493	9.25638e-17	GO:0008150 (biological_process)
Fmod	NM_021355	2.34268	7.39903e-16	NA
Gxylt2	NM_198612	1.23872	1.28868e-15	GO:0006464 (cellular protein modification process), GO:0006486 (protein glycosylation), GO:0006493 (protein O-linked glycosylation), GO:0008150 (biological_process), GO:0008152 (metabolic process), GO:0009058 (biosynthetic process), GO:0009059 (macromolecule biosynthetic process), GO:0009100 (glycoprotein metabolic process), GO:0009101 (glycoprotein biosynthetic process), GO:0009987 (cellular pro…
Fam105a	NM_198301	1.17336	1.42263e-14	GO:0008150 (biological_process)
Gab3	NM_181584	1.1644	2.38405e-14	GO:0002376 (immune system process), GO:0002520 (immune system development), GO:0002521 (leukocyte differentiation), GO:0002573 (myeloid leukocyte differentiation), GO:0007275 (multicellular organism development), GO:0008150 (biological_process), GO:0009987 (cellular process), GO:0030097 (hemopoiesis), GO:0030099 (myeloid cell differentiation), GO:0030154 (cell differentiation), GO:0030225 (macrop…
Gbgt1	NM_139197	1.09946	4.85207e-14	GO:0005975 (carbohydrate metabolic process), GO:0006629 (lipid metabolic process), GO:0006643 (membrane lipid metabolic process), GO:0006664 (glycolipid metabolic process), GO:0008150 (biological_process), GO:0008152 (metabolic process), GO:0008610 (lipid biosynthetic process), GO:0009058 (biosynthetic process), GO:0009247 (glycolipid biosynthetic process), GO:0009987 (cellular process), GO:00302…
Tlr7	NM_133211	1.19781	1.07293e-13	GO:0001774 (microglial cell activation), GO:0001775 (cell activation), GO:0001816 (cytokine production), GO:0001817 (regulation of cytokine production), GO:0001819 (positive regulation of cytokine producti...), GO:0001932 (regulation of protein phosphorylation), GO:0002218 (activation of innate immune response), GO:0002221 (pattern recognition receptor signaling p...), GO:0002224 (toll-like recep…
Fgd4	NM_139232	1.17502	1.15995e-13	GO:0000165 (MAPK cascade), GO:0000187 (activation of MAPK activity), GO:0000902 (cell morphogenesis), GO:0001932 (regulation of protein phosphorylation), GO:0001934 (positive regulation of protein phosphory...), GO:0006464 (cellular protein modification process), GO:0006468 (protein phosphorylation), GO:0006793 (phosphorus metabolic process), GO:0006796 (phosphate-containing compound metabolic ..…
Fyb	NM_011815	1.23362	1.42074e-13	GO:0002376 (immune system process), GO:0006955 (immune response), GO:0007009 (plasma membrane organization), GO:0007154 (cell communication), GO:0007165 (signal transduction), GO:0008104 (protein localization), GO:0008150 (biological_process), GO:0009987 (cellular process), GO:0010256 (endomembrane system organization), GO:0016043 (cellular component organization), GO:0023052 (signaling), GO:0033…
Lst1	NM_010734	1.41629	1.87322e-13	GO:0000902 (cell morphogenesis), GO:0001775 (cell activation), GO:0002376 (immune system process), GO:0002682 (regulation of immune system process), GO:0002694 (regulation of leukocyte activation), GO:0006955 (immune response), GO:0007275 (multicellular organism development), GO:0007399 (nervous system development), GO:0008150 (biological_process), GO:0008283 (cell proliferation), GO:0008360 (reg…
Rassf4	NM_178045	1.81356	2.00718e-13	GO:0007049 (cell cycle), GO:0007154 (cell communication), GO:0007165 (signal transduction), GO:0008150 (biological_process), GO:0009987 (cellular process), GO:0023052 (signaling), GO:0044699 (single-organism process), GO:0044700 (single organism signaling), GO:0044763 (single-organism cellular process), GO:0050789 (regulation of biological process), GO:0050794 (regulation of cellular process), GO…
Unc93b1	NM_019449	1.25681	5.94513e-13	GO:0000902 (cell morphogenesis), GO:0001816 (cytokine production), GO:0001817 (regulation of cytokine production), GO:0001819 (positive regulation of cytokine producti...), GO:0002218 (activation of innate immune response), GO:0002221 (pattern recognition receptor signaling p...), GO:0002224 (toll-like receptor signaling pathway), GO:0002250 (adaptive immune response), GO:0002252 (immune effector…
Clec4a2	NM_011999	1.58562	6.26069e-13	GO:0002250 (adaptive immune response), GO:0002376 (immune system process), GO:0006950 (response to stress), GO:0006952 (defense response), GO:0006955 (immune response), GO:0008150 (biological_process), GO:0045087 (innate immune response), GO:0050896 (response to stimulus)
Fpr1	NM_013521	1.61216	1.29076e-12	GO:0002253 (activation of immune response), GO:0002376 (immune system process), GO:0002429 (immune response-activating cell surface ...), GO:0002430 (complement receptor mediated signaling p...), GO:0002682 (regulation of immune system process), GO:0002684 (positive regulation of immune system pro...), GO:0002757 (immune response-activating signal transd...), GO:0002764 (immune response-regulatin…
Prex1	NM_177782	1.39477	1.29076e-12	GO:0000902 (cell morphogenesis), GO:0000904 (cell morphogenesis involved in different...), GO:0001775 (cell activation), GO:0001932 (regulation of protein phosphorylation), GO:0001933 (negative regulation of protein phosphory...), GO:0002376 (immune system process), GO:0002520 (immune system development), GO:0002521 (leukocyte differentiation), GO:0006461 (protein complex assembly), GO:0006464 (c…
Sirpa	NM_007547	1.32476	1.50096e-12	GO:0002244 (hematopoietic progenitor cell differenti...), GO:0002376 (immune system process), GO:0002520 (immune system development), GO:0006810 (transport), GO:0006897 (endocytosis), GO:0006909 (phagocytosis), GO:0006910 (phagocytosis, recognition), GO:0006911 (phagocytosis, engulfment), GO:0006928 (movement of cell or subcellular componen...), GO:0006996 (organelle organization), GO:0007010 (cy…
Arhgap25	NM_175476	1.11955	2.94592e-12	GO:0007154 (cell communication), GO:0007165 (signal transduction), GO:0008150 (biological_process), GO:0009987 (cellular process), GO:0023052 (signaling), GO:0044699 (single-organism process), GO:0044700 (single organism signaling), GO:0050789 (regulation of biological process), GO:0050794 (regulation of cellular process), GO:0050896 (response to stimulus), GO:0051716 (cellular response to stimul…
Mertk	NM_008587	1.32069	3.46587e-12	GO:0000003 (reproduction), GO:0000902 (cell morphogenesis), GO:0000904 (cell morphogenesis involved in different...), GO:0001654 (eye development), GO:0001775 (cell activation), GO:0001776 (leukocyte homeostasis), GO:0001779 (natural killer cell differentiation), GO:0001780 (neutrophil homeostasis), GO:0001816 (cytokine production), GO:0001817 (regulation of cytokine production), GO:0001818 (nega…
Rasgef1b	NM_145839	1.26475	3.55963e-12	GO:0007154 (cell communication), GO:0007165 (signal transduction), GO:0007264 (small GTPase mediated signal transductio...), GO:0008150 (biological_process), GO:0009987 (cellular process), GO:0023052 (signaling), GO:0035556 (intracellular signal transduction), GO:0043085 (positive regulation of catalytic activit...), GO:0043087 (regulation of GTPase activity), GO:0043547 (positive regulation of G…
Clec4b1	NM_027218	2.33404	4.00934e-12	GO:0006810 (transport), GO:0006811 (ion transport), GO:0006812 (cation transport), GO:0006816 (calcium ion transport), GO:0006873 (cellular ion homeostasis), GO:0006874 (cellular calcium ion homeostasis), GO:0006875 (cellular metal ion homeostasis), GO:0007204 (positive regulation of cytosolic calcium...), GO:0008150 (biological_process), GO:0009987 (cellular process), GO:0010522 (regulation of c…
Ptprj	NM_008982	1.19086	4.06262e-12	GO:0000165 (MAPK cascade), GO:0001558 (regulation of cell growth), GO:0001568 (blood vessel development), GO:0001570 (vasculogenesis), GO:0001775 (cell activation), GO:0001932 (regulation of protein phosphorylation), GO:0001933 (negative regulation of protein phosphory...), GO:0001944 (vasculature development), GO:0001952 (regulation of cell-matrix adhesion), GO:0001954 (positive regulation of ce…
Tlr1	NM_030682	1.59947	4.22441e-12	GO:0001774 (microglial cell activation), GO:0001775 (cell activation), GO:0001816 (cytokine production), GO:0001817 (regulation of cytokine production), GO:0001819 (positive regulation of cytokine producti...), GO:0001932 (regulation of protein phosphorylation), GO:0001934 (positive regulation of protein phosphory...), GO:0002218 (activation of innate immune response), GO:0002221 (pattern recogni…
Clec4a3	NM_153197	1.74302	7.30629e-12	GO:0008150 (biological_process)
Tlr8	NM_133212	1.34686	7.71048e-12	GO:0001774 (microglial cell activation), GO:0001775 (cell activation), GO:0001816 (cytokine production), GO:0001817 (regulation of cytokine production), GO:0001818 (negative regulation of cytokine producti...), GO:0001819 (positive regulation of cytokine producti...), GO:0001932 (regulation of protein phosphorylation), GO:0002218 (activation of innate immune response), GO:0002221 (pattern recogni…
C3ar1	NM_009779	1.00666	8.5243e-12	GO:0001525 (angiogenesis), GO:0001568 (blood vessel development), GO:0001655 (urogenital system development), GO:0001816 (cytokine production), GO:0001817 (regulation of cytokine production), GO:0001819 (positive regulation of cytokine producti...), GO:0001822 (kidney development), GO:0001944 (vasculature development), GO:0002250 (adaptive immune response), GO:0002253 (activation of immune respon…
Vsir	NM_028732	1.36541	1.10393e-11	GO:0001775 (cell activation), GO:0001816 (cytokine production), GO:0001817 (regulation of cytokine production), GO:0001818 (negative regulation of cytokine producti...), GO:0002250 (adaptive immune response), GO:0002252 (immune effector process), GO:0002367 (cytokine production involved in immune r...), GO:0002369 (T cell cytokine production), GO:0002376 (immune system process), GO:0002440 (produ…
Lpar5	NM_001163268	1.29274	1.59429e-11	GO:0006139 (nucleobase-containing compound metabolic...), GO:0006351 (transcription, DNA-templated), GO:0006355 (regulation of transcription, DNA-templat...), GO:0006725 (cellular aromatic compound metabolic pro...), GO:0006807 (nitrogen compound metabolic process), GO:0006950 (response to stress), GO:0007154 (cell communication), GO:0007165 (signal transduction), GO:0007186 (G-protein coupled re…
Rgs2	NM_009061	1.10817	2.33263e-11	GO:0000003 (reproduction), GO:0000165 (MAPK cascade), GO:0000226 (microtubule cytoskeleton organization), GO:0001932 (regulation of protein phosphorylation), GO:0001933 (negative regulation of protein phosphory...), GO:0003008 (system process), GO:0003012 (muscle system process), GO:0003013 (circulatory system process), GO:0003015 (heart process), GO:0003018 (vascular process in circulatory syste…
Ms4a7	NM_027836	1.10534	2.62313e-11	GO:0008150 (biological_process)
Arhgef6	NM_152801	1.10808	4.37786e-11	GO:0007154 (cell communication), GO:0007165 (signal transduction), GO:0007264 (small GTPase mediated signal transductio...), GO:0007265 (Ras protein signal transduction), GO:0007266 (Rho protein signal transduction), GO:0008150 (biological_process), GO:0009966 (regulation of signal transduction), GO:0009987 (cellular process), GO:0010646 (regulation of cell communication), GO:0016043 (cellular co…
Cd300c2	NM_134158	1.32593	4.59914e-11	GO:0001816 (cytokine production), GO:0001817 (regulation of cytokine production), GO:0001819 (positive regulation of cytokine producti...), GO:0002376 (immune system process), GO:0002790 (peptide secretion), GO:0002791 (regulation of peptide secretion), GO:0002793 (positive regulation of peptide secretion), GO:0006810 (transport), GO:0008104 (protein localization), GO:0008150 (biological_process)…
Cdh26	NM_198656	1.48054	4.72141e-11	GO:0007155 (cell adhesion), GO:0007156 (homophilic cell adhesion via plasma memb...), GO:0008150 (biological_process), GO:0022610 (biological adhesion), GO:0098609 (cell-cell adhesion), GO:0098742 (cell-cell adhesion via plasma-membrane a...)
Lpcat2	NM_173014	1.44777	4.72141e-11	GO:0006629 (lipid metabolic process), GO:0006644 (phospholipid metabolic process), GO:0006650 (glycerophospholipid metabolic process), GO:0006793 (phosphorus metabolic process), GO:0006796 (phosphate-containing compound metabolic ...), GO:0006807 (nitrogen compound metabolic process), GO:0008150 (biological_process), GO:0008152 (metabolic process), GO:0008610 (lipid biosynthetic process), GO:0008…
Abca9	NM_147220	1.38177	4.82204e-11	GO:0006810 (transport), GO:0006869 (lipid transport), GO:0008150 (biological_process), GO:0010876 (lipid localization), GO:0033036 (macromolecule localization), GO:0044699 (single-organism process), GO:0044765 (single-organism transport), GO:0051179 (localization), GO:0051234 (establishment of localization), GO:0071702 (organic substance transport), GO:1902578 (single-organism localization)
Wdfy4	NM_001146022	1.16602	4.82204e-11	NA
Megf6	NM_001162977	1.42642	5.80678e-11	GO:0008150 (biological_process)
Siglece	NM_031181	2.14644	9.48976e-11	GO:0006810 (transport), GO:0006897 (endocytosis), GO:0006909 (phagocytosis), GO:0006911 (phagocytosis, engulfment), GO:0006950 (response to stress), GO:0006952 (defense response), GO:0006954 (inflammatory response), GO:0007155 (cell adhesion), GO:0008150 (biological_process), GO:0009605 (response to external stimulus), GO:0009987 (cellular process), GO:0010324 (membrane invagination), GO:0016043 …
Inpp5d	NM_010566	1.1045	1.18718e-10	GO:0001775 (cell activation), GO:0001816 (cytokine production), GO:0001817 (regulation of cytokine production), GO:0001818 (negative regulation of cytokine producti...), GO:0001894 (tissue homeostasis), GO:0002250 (adaptive immune response), GO:0002252 (immune effector process), GO:0002262 (myeloid cell homeostasis), GO:0002376 (immune system process), GO:0002443 (leukocyte mediated immunity), GO…
Il16	NM_010551	1.63162	1.55246e-10	GO:0002376 (immune system process), GO:0006139 (nucleobase-containing compound metabolic...), GO:0006351 (transcription, DNA-templated), GO:0006355 (regulation of transcription, DNA-templat...), GO:0006725 (cellular aromatic compound metabolic pro...), GO:0006807 (nitrogen compound metabolic process), GO:0006810 (transport), GO:0006811 (ion transport), GO:0006812 (cation transport), GO:0006816 (c…
Myo1f	NM_053214	1.13882	2.05514e-10	GO:0001775 (cell activation), GO:0002252 (immune effector process), GO:0002263 (cell activation involved in immune respo...), GO:0002274 (myeloid leukocyte activation), GO:0002275 (myeloid cell activation involved in immu...), GO:0002283 (neutrophil activation involved in immune...), GO:0002366 (leukocyte activation involved in immune ...), GO:0002376 (immune system process), GO:0002443 (leukocyt…
Itga4	NM_010576	1.3495	2.12463e-10	GO:0000003 (reproduction), GO:0000902 (cell morphogenesis), GO:0000904 (cell morphogenesis involved in different...), GO:0001667 (ameboidal-type cell migration), GO:0001701 (in utero embryonic development), GO:0001890 (placenta development), GO:0001892 (embryonic placenta development), GO:0001974 (blood vessel remodeling), GO:0002376 (immune system process), GO:0002682 (regulation of immune syste…
Rgag4	NM_001278534	1.64785	2.48025e-10	GO:0008150 (biological_process)
Adap2	NM_172133	1.09912	2.71984e-10	GO:0007154 (cell communication), GO:0007165 (signal transduction), GO:0007275 (multicellular organism development), GO:0007507 (heart development), GO:0008150 (biological_process), GO:0009987 (cellular process), GO:0023052 (signaling), GO:0032501 (multicellular organismal process), GO:0032502 (developmental process), GO:0035556 (intracellular signal transduction), GO:0044699 (single-organism proc…
Slc43a2	NM_173388	1.0371	2.98835e-10	GO:0006810 (transport), GO:0006811 (ion transport), GO:0006820 (anion transport), GO:0006865 (amino acid transport), GO:0008150 (biological_process), GO:0015711 (organic anion transport), GO:0015807 (L-amino acid transport), GO:0015849 (organic acid transport), GO:0044699 (single-organism process), GO:0044765 (single-organism transport), GO:0046942 (carboxylic acid transport), GO:0051179 (localiz…
Clec4a1	NM_199311	1.47556	3.27537e-10	GO:0008150 (biological_process)
Mpeg1	NM_010821	1.09562	3.4677e-10	NA
Batf	NM_016767	1.13197	4.12745e-10	GO:0001562 (response to protozoan), GO:0001773 (myeloid dendritic cell activation), GO:0001775 (cell activation), GO:0001816 (cytokine production), GO:0002200 (somatic diversification of immune recept...), GO:0002204 (somatic recombination of immunoglobulin ...), GO:0002208 (somatic diversification of immunoglobuli...), GO:0002244 (hematopoietic progenitor cell differenti...), GO:0002250 (adaptiv…
Nfatc2	NM_010899	1.37405	4.81076e-10	GO:0000122 (negative regulation of transcription fro...), GO:0000768 (syncytium formation by plasma membrane f...), GO:0001775 (cell activation), GO:0001816 (cytokine production), GO:0002253 (activation of immune response), GO:0002376 (immune system process), GO:0002429 (immune response-activating cell surface ...), GO:0002682 (regulation of immune system process), GO:0002684 (positive regulation…
Cd84	NM_013489	1.03202	4.93667e-10	GO:0000165 (MAPK cascade), GO:0001775 (cell activation), GO:0001816 (cytokine production), GO:0001817 (regulation of cytokine production), GO:0001818 (negative regulation of cytokine producti...), GO:0001819 (positive regulation of cytokine producti...), GO:0001932 (regulation of protein phosphorylation), GO:0001934 (positive regulation of protein phosphory...), GO:0002115 (store-operated calcium…
Nlrp1a	NM_001004142	1.27221	5.17492e-10	GO:0001816 (cytokine production), GO:0001817 (regulation of cytokine production), GO:0001819 (positive regulation of cytokine producti...), GO:0002790 (peptide secretion), GO:0002791 (regulation of peptide secretion), GO:0002793 (positive regulation of peptide secretion), GO:0006810 (transport), GO:0006915 (apoptotic process), GO:0006950 (response to stress), GO:0006952 (defense response), GO:000…
Cd300ld5	NM_001101657	1.68012	5.30839e-10	GO:0008150 (biological_process)
Gngt2	NM_023121	1.03733	5.60492e-10	GO:0007154 (cell communication), GO:0007165 (signal transduction), GO:0007186 (G-protein coupled receptor signaling pat...), GO:0008150 (biological_process), GO:0009987 (cellular process), GO:0023052 (signaling), GO:0044699 (single-organism process), GO:0044700 (single organism signaling), GO:0050789 (regulation of biological process), GO:0050794 (regulation of cellular process), GO:0050896 (resp…
Rassf2	NM_175445	1.14642	6.36562e-10	GO:0000165 (MAPK cascade), GO:0001501 (skeletal system development), GO:0001503 (ossification), GO:0001649 (osteoblast differentiation), GO:0001932 (regulation of protein phosphorylation), GO:0001933 (negative regulation of protein phosphory...), GO:0001934 (positive regulation of protein phosphory...), GO:0002376 (immune system process), GO:0002520 (immune system development), GO:0002521 (leukoc…
Cd37	NM_007645	1.04931	6.44237e-10	GO:0001562 (response to protozoan), GO:0001773 (myeloid dendritic cell activation), GO:0001775 (cell activation), GO:0002252 (immune effector process), GO:0002274 (myeloid leukocyte activation), GO:0002376 (immune system process), GO:0002377 (immunoglobulin production), GO:0002440 (production of molecular mediator of immu...), GO:0002637 (regulation of immunoglobulin production), GO:0002639 (posi…
Aoah	NM_012054	1.48726	6.97286e-10	GO:0005975 (carbohydrate metabolic process), GO:0005976 (polysaccharide metabolic process), GO:0006629 (lipid metabolic process), GO:0006950 (response to stress), GO:0006952 (defense response), GO:0006954 (inflammatory response), GO:0008150 (biological_process), GO:0008152 (metabolic process), GO:0009605 (response to external stimulus), GO:0009987 (cellular process), GO:0031347 (regulation of def…
Ly86	NM_010745	1.44916	7.0409e-10	GO:0002237 (response to molecule of bacterial origin), GO:0002376 (immune system process), GO:0002831 (regulation of response to biotic stimulu...), GO:0002833 (positive regulation of response to bioti...), GO:0006950 (response to stress), GO:0006952 (defense response), GO:0006954 (inflammatory response), GO:0006955 (immune response), GO:0007154 (cell communication), GO:0007165 (signal transducti…
Pou2f2	NM_011138	1.57026	8.29066e-10	GO:0001775 (cell activation), GO:0002250 (adaptive immune response), GO:0002252 (immune effector process), GO:0002335 (mature B cell differentiation), GO:0002376 (immune system process), GO:0002377 (immunoglobulin production), GO:0002381 (immunoglobulin production involved in im...), GO:0002440 (production of molecular mediator of immu...), GO:0002443 (leukocyte mediated immunity), GO:0002449 (ly…
Csf1r	NM_001037859	1.29513	8.43218e-10	GO:0000165 (MAPK cascade), GO:0000902 (cell morphogenesis), GO:0000904 (cell morphogenesis involved in different...), GO:0001816 (cytokine production), GO:0001817 (regulation of cytokine production), GO:0001819 (positive regulation of cytokine producti...), GO:0001894 (tissue homeostasis), GO:0001932 (regulation of protein phosphorylation), GO:0001934 (positive regulation of protein phosphory...)…
Rac2	NM_009008	1.23097	8.62651e-10	GO:0001775 (cell activation), GO:0001894 (tissue homeostasis), GO:0002252 (immune effector process), GO:0002263 (cell activation involved in immune respo...), GO:0002274 (myeloid leukocyte activation), GO:0002275 (myeloid cell activation involved in immu...), GO:0002279 (mast cell activation involved in immune ...), GO:0002366 (leukocyte activation involved in immune ...), GO:0002376 (immune syst…
Blnk	NM_008528	1.35316	9.22801e-10	GO:0001775 (cell activation), GO:0002376 (immune system process), GO:0006955 (immune response), GO:0007154 (cell communication), GO:0007165 (signal transduction), GO:0008150 (biological_process), GO:0009987 (cellular process), GO:0023052 (signaling), GO:0035556 (intracellular signal transduction), GO:0042113 (B cell activation), GO:0044699 (single-organism process), GO:0044700 (single organism si…
Cd22	NM_009845	1.14082	9.61296e-10	GO:0007154 (cell communication), GO:0007155 (cell adhesion), GO:0007165 (signal transduction), GO:0007166 (cell surface receptor signaling pathway), GO:0008150 (biological_process), GO:0009987 (cellular process), GO:0022610 (biological adhesion), GO:0023052 (signaling), GO:0044699 (single-organism process), GO:0044700 (single organism signaling), GO:0050789 (regulation of biological process), GO:…
Susd3	NM_025491	1.14497	9.84104e-10	GO:0008150 (biological_process)
Pik3cd	NM_001164052	1.16044	9.98434e-10	GO:0001775 (cell activation), GO:0001776 (leukocyte homeostasis), GO:0001780 (neutrophil homeostasis), GO:0001781 (neutrophil apoptotic process), GO:0001782 (B cell homeostasis), GO:0002250 (adaptive immune response), GO:0002260 (lymphocyte homeostasis), GO:0002262 (myeloid cell homeostasis), GO:0002376 (immune system process), GO:0002682 (regulation of immune system process), GO:0002684 (positiv…
Pag1	NM_053182	1.11163	1.07259e-09	GO:0001775 (cell activation), GO:0002250 (adaptive immune response), GO:0002376 (immune system process), GO:0002682 (regulation of immune system process), GO:0002683 (negative regulation of immune system pro...), GO:0002694 (regulation of leukocyte activation), GO:0002695 (negative regulation of leukocyte activat...), GO:0006955 (immune response), GO:0007154 (cell communication), GO:0007155 (cell…
Adap1	NM_172723	1.18479	1.11558e-09	GO:0008150 (biological_process), GO:0043087 (regulation of GTPase activity), GO:0050790 (regulation of catalytic activity), GO:0051336 (regulation of hydrolase activity), GO:0065007 (biological regulation), GO:0065009 (regulation of molecular function)
Cybb	NM_007807	1.27121	1.21629e-09	GO:0001525 (angiogenesis), GO:0001568 (blood vessel development), GO:0001666 (response to hypoxia), GO:0001816 (cytokine production), GO:0001817 (regulation of cytokine production), GO:0001819 (positive regulation of cytokine producti...), GO:0001944 (vasculature development), GO:0002376 (immune system process), GO:0006801 (superoxide metabolic process), GO:0006810 (transport), GO:0006811 (ion tr…
Csf3r	NM_007782	1.38604	1.22371e-09	GO:0002376 (immune system process), GO:0002520 (immune system development), GO:0002682 (regulation of immune system process), GO:0006928 (movement of cell or subcellular componen...), GO:0006935 (chemotaxis), GO:0007155 (cell adhesion), GO:0007275 (multicellular organism development), GO:0008150 (biological_process), GO:0009605 (response to external stimulus), GO:0009987 (cellular process), GO:00…
Apoe	NM_009696	1.57897	1.27052e-09	GO:0000165 (MAPK cascade), GO:0000902 (cell morphogenesis), GO:0000904 (cell morphogenesis involved in different...), GO:0001558 (regulation of cell growth), GO:0001568 (blood vessel development), GO:0001667 (ameboidal-type cell migration), GO:0001775 (cell activation), GO:0001932 (regulation of protein phosphorylation), GO:0001933 (negative regulation of protein phosphory...), GO:0001935 (endoth…
Fli1	NM_008026	1.02431	1.40006e-09	GO:0001501 (skeletal system development), GO:0002376 (immune system process), GO:0002520 (immune system development), GO:0003008 (system process), GO:0003013 (circulatory system process), GO:0006139 (nucleobase-containing compound metabolic...), GO:0006351 (transcription, DNA-templated), GO:0006355 (regulation of transcription, DNA-templat...), GO:0006357 (regulation of transcription from RNA pol…
Prkcb	NM_008855	1.4739	1.57218e-09	GO:0001525 (angiogenesis), GO:0001568 (blood vessel development), GO:0001666 (response to hypoxia), GO:0001775 (cell activation), GO:0001944 (vasculature development), GO:0002250 (adaptive immune response), GO:0002253 (activation of immune response), GO:0002376 (immune system process), GO:0002429 (immune response-activating cell surface ...), GO:0002682 (regulation of immune system process), GO:0…
Evl	NM_007965	1.06938	1.57359e-09	GO:0000902 (cell morphogenesis), GO:0000904 (cell morphogenesis involved in different...), GO:0001667 (ameboidal-type cell migration), GO:0001775 (cell activation), GO:0006461 (protein complex assembly), GO:0006928 (movement of cell or subcellular componen...), GO:0006935 (chemotaxis), GO:0006950 (response to stress), GO:0006996 (organelle organization), GO:0007010 (cytoskeleton organization), GO…
Slc13a3	NM_054055	1.94526	1.71238e-09	GO:0006810 (transport), GO:0006811 (ion transport), GO:0006812 (cation transport), GO:0006814 (sodium ion transport), GO:0006820 (anion transport), GO:0006835 (dicarboxylic acid transport), GO:0006865 (amino acid transport), GO:0008150 (biological_process), GO:0015672 (monovalent inorganic cation transport), GO:0015711 (organic anion transport), GO:0015740 (C4-dicarboxylate transport), GO:0015800…
Fgd3	NM_015759	1.04897	1.75169e-09	GO:0007154 (cell communication), GO:0007165 (signal transduction), GO:0007264 (small GTPase mediated signal transductio...), GO:0007265 (Ras protein signal transduction), GO:0007266 (Rho protein signal transduction), GO:0008150 (biological_process), GO:0009966 (regulation of signal transduction), GO:0009987 (cellular process), GO:0010646 (regulation of cell communication), GO:0016043 (cellular co…
Abcg1	NM_009593	1.2472	1.7862e-09	GO:0006066 (alcohol metabolic process), GO:0006139 (nucleobase-containing compound metabolic...), GO:0006351 (transcription, DNA-templated), GO:0006355 (regulation of transcription, DNA-templat...), GO:0006629 (lipid metabolic process), GO:0006694 (steroid biosynthetic process), GO:0006695 (cholesterol biosynthetic process), GO:0006725 (cellular aromatic compound metabolic pro...), GO:0006807 (ni…
Lrmp	NM_001281980	1.38064	1.84492e-09	GO:0000003 (reproduction), GO:0002376 (immune system process), GO:0007338 (single fertilization), GO:0008150 (biological_process), GO:0009566 (fertilization), GO:0019953 (sexual reproduction), GO:0022414 (reproductive process), GO:0044699 (single-organism process), GO:0044702 (single organism reproductive process), GO:0044703 (multi-organism reproductive process), GO:0051704 (multi-organism proce…
Ppfia4	NM_001144855	1.61663	1.87519e-09	GO:0008150 (biological_process)
Ticam2	NM_173394	1.40713	1.88517e-09	GO:0001816 (cytokine production), GO:0001817 (regulation of cytokine production), GO:0001818 (negative regulation of cytokine producti...), GO:0001819 (positive regulation of cytokine producti...), GO:0001959 (regulation of cytokine-mediated signalin...), GO:0001961 (positive regulation of cytokine-mediated...), GO:0002218 (activation of innate immune response), GO:0002221 (pattern recognition re…
AB124611	NM_206536	1.15755	2.01953e-09	GO:0008150 (biological_process)
Iqgap2	NM_027711	1.10348	2.03081e-09	GO:0006461 (protein complex assembly), GO:0006996 (organelle organization), GO:0007010 (cytoskeleton organization), GO:0007015 (actin filament organization), GO:0007154 (cell communication), GO:0007165 (signal transduction), GO:0007186 (G-protein coupled receptor signaling pat...), GO:0008064 (regulation of actin polymerization or de...), GO:0008150 (biological_process), GO:0008154 (actin polymer…
Lyl1	NM_008535	1.61922	2.4771e-09	GO:0001568 (blood vessel development), GO:0001775 (cell activation), GO:0001944 (vasculature development), GO:0001955 (blood vessel maturation), GO:0002376 (immune system process), GO:0002520 (immune system development), GO:0002521 (leukocyte differentiation), GO:0006139 (nucleobase-containing compound metabolic...), GO:0006351 (transcription, DNA-templated), GO:0006355 (regulation of transcripti…
Sash3	NM_028773	1.12903	2.82766e-09	GO:0001775 (cell activation), GO:0001816 (cytokine production), GO:0001817 (regulation of cytokine production), GO:0001819 (positive regulation of cytokine producti...), GO:0001894 (tissue homeostasis), GO:0002250 (adaptive immune response), GO:0002252 (immune effector process), GO:0002367 (cytokine production involved in immune r...), GO:0002369 (T cell cytokine production), GO:0002376 (immune s…
Slc9a9	NM_177909	1.05762	2.86891e-09	GO:0006810 (transport), GO:0006811 (ion transport), GO:0006812 (cation transport), GO:0006813 (potassium ion transport), GO:0006814 (sodium ion transport), GO:0006873 (cellular ion homeostasis), GO:0006885 (regulation of pH), GO:0008150 (biological_process), GO:0009987 (cellular process), GO:0015672 (monovalent inorganic cation transport), GO:0019725 (cellular homeostasis), GO:0030001 (metal ion …
Fam49a	NM_029758	1.10477	2.90021e-09	GO:0008150 (biological_process)
Cx3cr1	NM_009987	1.46914	3.02678e-09	GO:0001525 (angiogenesis), GO:0001568 (blood vessel development), GO:0001774 (microglial cell activation), GO:0001775 (cell activation), GO:0001944 (vasculature development), GO:0002052 (positive regulation of neuroblast prolif...), GO:0002252 (immune effector process), GO:0002263 (cell activation involved in immune respo...), GO:0002274 (myeloid leukocyte activation), GO:0002275 (myeloid cell ac…
Tnfaip8l2	NM_027206	1.33681	3.04646e-09	GO:0001775 (cell activation), GO:0002376 (immune system process), GO:0002682 (regulation of immune system process), GO:0002683 (negative regulation of immune system pro...), GO:0002694 (regulation of leukocyte activation), GO:0002695 (negative regulation of leukocyte activat...), GO:0006950 (response to stress), GO:0006952 (defense response), GO:0006954 (inflammatory response), GO:0006955 (immune…
Gm21188	NM_001302966	1.28174	3.1876e-09	NA
B3galnt1	NM_020026	1.53382	3.20315e-09	GO:0005975 (carbohydrate metabolic process), GO:0006464 (cellular protein modification process), GO:0006486 (protein glycosylation), GO:0008150 (biological_process), GO:0008152 (metabolic process), GO:0009058 (biosynthetic process), GO:0009059 (macromolecule biosynthetic process), GO:0009100 (glycoprotein metabolic process), GO:0009101 (glycoprotein biosynthetic process), GO:0009311 (oligosacchar…
Pik3cg	NM_020272	1.11076	3.67204e-09	GO:0000165 (MAPK cascade), GO:0001525 (angiogenesis), GO:0001568 (blood vessel development), GO:0001932 (regulation of protein phosphorylation), GO:0001934 (positive regulation of protein phosphory...), GO:0001944 (vasculature development), GO:0002376 (immune system process), GO:0002526 (acute inflammatory response), GO:0002673 (regulation of acute inflammatory respons...), GO:0002675 (positive r…
Acp5	NM_007388	1.1608	3.8269e-09	GO:0001501 (skeletal system development), GO:0001816 (cytokine production), GO:0001817 (regulation of cytokine production), GO:0001818 (negative regulation of cytokine producti...), GO:0001894 (tissue homeostasis), GO:0002237 (response to molecule of bacterial origin), GO:0006793 (phosphorus metabolic process), GO:0006796 (phosphate-containing compound metabolic ...), GO:0006801 (superoxide metab…
Aif1	NM_019467	1.24664	3.84872e-09	GO:0000082 (G1/S transition of mitotic cell cycle), GO:0000278 (mitotic cell cycle), GO:0001774 (microglial cell activation), GO:0001775 (cell activation), GO:0001932 (regulation of protein phosphorylation), GO:0001934 (positive regulation of protein phosphory...), GO:0002274 (myeloid leukocyte activation), GO:0002376 (immune system process), GO:0002548 (monocyte chemotaxis), GO:0002682 (regulati…
Igsf6	NM_030691	1.22184	4.73962e-09	GO:0008150 (biological_process)
Cd300a	NM_170758	1.57856	5.39518e-09	GO:0000165 (MAPK cascade), GO:0001775 (cell activation), GO:0001820 (serotonin secretion), GO:0001932 (regulation of protein phosphorylation), GO:0001933 (negative regulation of protein phosphory...), GO:0001934 (positive regulation of protein phosphory...), GO:0002218 (activation of innate immune response), GO:0002221 (pattern recognition receptor signaling p...), GO:0002224 (toll-like receptor …
Ncf1	NM_010876	1.04468	5.66894e-09	GO:0000165 (MAPK cascade), GO:0000302 (response to reactive oxygen species), GO:0001878 (response to yeast), GO:0001906 (cell killing), GO:0001909 (leukocyte mediated cytotoxicity), GO:0001932 (regulation of protein phosphorylation), GO:0001934 (positive regulation of protein phosphory...), GO:0002252 (immune effector process), GO:0002376 (immune system process), GO:0002443 (leukocyte mediated im…
Cd300ld3	NM_199201	1.37655	6.11345e-09	GO:0002218 (activation of innate immune response), GO:0002221 (pattern recognition receptor signaling p...), GO:0002224 (toll-like receptor signaling pathway), GO:0002253 (activation of immune response), GO:0002376 (immune system process), GO:0002682 (regulation of immune system process), GO:0002684 (positive regulation of immune system pro...), GO:0002757 (immune response-activating signal trans…
B3gnt8	NM_146184	1.45128	6.14262e-09	GO:0000271 (polysaccharide biosynthetic process), GO:0005975 (carbohydrate metabolic process), GO:0005976 (polysaccharide metabolic process), GO:0006022 (aminoglycan metabolic process), GO:0006023 (aminoglycan biosynthetic process), GO:0006464 (cellular protein modification process), GO:0006486 (protein glycosylation), GO:0006807 (nitrogen compound metabolic process), GO:0008150 (biological_proce…

## Sheet: day7_Top100.UP.DEGs
Table S1c. The top 100 most significantly differentially upregulated genes between Vehicle and RXDX-106 treated MC83 mice at day 7 (ranked by FDR). Statistical significance was defined as |log2FC|>1, FDR<0.01 and FPKM>1 in 2 or more samples within the contrasting groups. 42/100 (42%) of the most significantly upregulated genes at day 7 annotate to an immunological GO term as indicated in the yell…
SYMBOL	REFSEQ	logFC	FDR	GO.ID
Cd22	NM_009845	1.36149	3.42734e-13	GO:0007154 (cell communication), GO:0007155 (cell adhesion), GO:0007165 (signal transduction), GO:0007166 (cell surface receptor signaling pathway), GO:0008150 (biological_process), GO:0009987 (cellular process), GO:0022610 (biological adhesion), GO:0023052 (signaling), GO:0044699 (single-organism process), GO:0044700 (single organism signaling), GO:0050789 (regulation of biological process), GO:…
Adgre1	NM_010130	1.16028	8.62196e-12	GO:0002250 (adaptive immune response), GO:0002376 (immune system process), GO:0006955 (immune response), GO:0007154 (cell communication), GO:0007165 (signal transduction), GO:0007166 (cell surface receptor signaling pathway), GO:0007186 (G-protein coupled receptor signaling pat...), GO:0008150 (biological_process), GO:0009987 (cellular process), GO:0023052 (signaling), GO:0044699 (single-organism…
Fmod	NM_021355	1.92306	2.22455e-11	NA
Fpr1	NM_013521	1.45822	7.61729e-11	GO:0002253 (activation of immune response), GO:0002376 (immune system process), GO:0002429 (immune response-activating cell surface ...), GO:0002430 (complement receptor mediated signaling p...), GO:0002682 (regulation of immune system process), GO:0002684 (positive regulation of immune system pro...), GO:0002757 (immune response-activating signal transd...), GO:0002764 (immune response-regulatin…
Tlr7	NM_133211	1.06163	7.61729e-11	GO:0001774 (microglial cell activation), GO:0001775 (cell activation), GO:0001816 (cytokine production), GO:0001817 (regulation of cytokine production), GO:0001819 (positive regulation of cytokine producti...), GO:0001932 (regulation of protein phosphorylation), GO:0002218 (activation of innate immune response), GO:0002221 (pattern recognition receptor signaling p...), GO:0002224 (toll-like recep…
Apoe	NM_009696	1.62645	6.8157e-10	GO:0000165 (MAPK cascade), GO:0000902 (cell morphogenesis), GO:0000904 (cell morphogenesis involved in different...), GO:0001558 (regulation of cell growth), GO:0001568 (blood vessel development), GO:0001667 (ameboidal-type cell migration), GO:0001775 (cell activation), GO:0001932 (regulation of protein phosphorylation), GO:0001933 (negative regulation of protein phosphory...), GO:0001935 (endoth…
Lst1	NM_010734	1.13493	7.46066e-09	GO:0000902 (cell morphogenesis), GO:0001775 (cell activation), GO:0002376 (immune system process), GO:0002682 (regulation of immune system process), GO:0002694 (regulation of leukocyte activation), GO:0006955 (immune response), GO:0007275 (multicellular organism development), GO:0007399 (nervous system development), GO:0008150 (biological_process), GO:0008283 (cell proliferation), GO:0008360 (reg…
Tlr8	NM_133212	1.12751	2.3844e-08	GO:0001774 (microglial cell activation), GO:0001775 (cell activation), GO:0001816 (cytokine production), GO:0001817 (regulation of cytokine production), GO:0001818 (negative regulation of cytokine producti...), GO:0001819 (positive regulation of cytokine producti...), GO:0001932 (regulation of protein phosphorylation), GO:0002218 (activation of innate immune response), GO:0002221 (pattern recogni…
Clec4a3	NM_153197	1.42937	3.75102e-08	GO:0008150 (biological_process)
Lpcat2	NM_173014	1.22261	6.61219e-08	GO:0006629 (lipid metabolic process), GO:0006644 (phospholipid metabolic process), GO:0006650 (glycerophospholipid metabolic process), GO:0006793 (phosphorus metabolic process), GO:0006796 (phosphate-containing compound metabolic ...), GO:0006807 (nitrogen compound metabolic process), GO:0008150 (biological_process), GO:0008152 (metabolic process), GO:0008610 (lipid biosynthetic process), GO:0008…
P2ry13	NM_028808	1.36242	8.44042e-08	GO:0006139 (nucleobase-containing compound metabolic...), GO:0006140 (regulation of nucleotide metabolic proce...), GO:0006163 (purine nucleotide metabolic process), GO:0006164 (purine nucleotide biosynthetic process), GO:0006171 (cAMP biosynthetic process), GO:0006725 (cellular aromatic compound metabolic pro...), GO:0006753 (nucleoside phosphate metabolic process), GO:0006793 (phosphorus metabo…
Clec4a4	NM_001005860	1.72332	8.68849e-08	GO:0008150 (biological_process)
Tlr1	NM_030682	1.26668	9.52786e-08	GO:0001774 (microglial cell activation), GO:0001775 (cell activation), GO:0001816 (cytokine production), GO:0001817 (regulation of cytokine production), GO:0001819 (positive regulation of cytokine producti...), GO:0001932 (regulation of protein phosphorylation), GO:0001934 (positive regulation of protein phosphory...), GO:0002218 (activation of innate immune response), GO:0002221 (pattern recogni…
Rasgef1b	NM_145839	1.00187	9.59883e-08	GO:0007154 (cell communication), GO:0007165 (signal transduction), GO:0007264 (small GTPase mediated signal transductio...), GO:0008150 (biological_process), GO:0009987 (cellular process), GO:0023052 (signaling), GO:0035556 (intracellular signal transduction), GO:0043085 (positive regulation of catalytic activit...), GO:0043087 (regulation of GTPase activity), GO:0043547 (positive regulation of G…
Cd83	NM_009856	1.33394	1.36361e-07	GO:0001775 (cell activation), GO:0001816 (cytokine production), GO:0001817 (regulation of cytokine production), GO:0001818 (negative regulation of cytokine producti...), GO:0001819 (positive regulation of cytokine producti...), GO:0002376 (immune system process), GO:0002520 (immune system development), GO:0002521 (leukocyte differentiation), GO:0002682 (regulation of immune system process), GO:00…
Klk1	NM_010639	1.68596	2.33719e-07	GO:0006508 (proteolysis), GO:0008150 (biological_process), GO:0008152 (metabolic process), GO:0019538 (protein metabolic process), GO:0043170 (macromolecule metabolic process), GO:0044238 (primary metabolic process), GO:0071704 (organic substance metabolic process)
Clec4a2	NM_011999	1.17428	2.38198e-07	GO:0002250 (adaptive immune response), GO:0002376 (immune system process), GO:0006950 (response to stress), GO:0006952 (defense response), GO:0006955 (immune response), GO:0008150 (biological_process), GO:0045087 (innate immune response), GO:0050896 (response to stimulus)
Itga4	NM_010576	1.12686	2.81758e-07	GO:0000003 (reproduction), GO:0000902 (cell morphogenesis), GO:0000904 (cell morphogenesis involved in different...), GO:0001667 (ameboidal-type cell migration), GO:0001701 (in utero embryonic development), GO:0001890 (placenta development), GO:0001892 (embryonic placenta development), GO:0001974 (blood vessel remodeling), GO:0002376 (immune system process), GO:0002682 (regulation of immune syste…
Gm6377	NM_001037917	1.11939	3.33798e-07	GO:0008150 (biological_process)
Clec4a1	NM_199311	1.23035	3.64175e-07	GO:0008150 (biological_process)
Klra2	NM_008462	1.17595	4.89695e-07	GO:0007155 (cell adhesion), GO:0008150 (biological_process), GO:0022610 (biological adhesion)
Ebi3	NM_015766	1.1374	5.14468e-07	GO:0001775 (cell activation), GO:0002376 (immune system process), GO:0008150 (biological_process), GO:0008283 (cell proliferation), GO:0009987 (cellular process), GO:0032943 (mononuclear cell proliferation), GO:0042098 (T cell proliferation), GO:0042110 (T cell activation), GO:0044699 (single-organism process), GO:0044763 (single-organism cellular process), GO:0045321 (leukocyte activation), GO:0…
Megf6	NM_001162977	1.12035	6.41549e-07	GO:0008150 (biological_process)
Prex1	NM_177782	1.00653	7.61584e-07	GO:0000902 (cell morphogenesis), GO:0000904 (cell morphogenesis involved in different...), GO:0001775 (cell activation), GO:0001932 (regulation of protein phosphorylation), GO:0001933 (negative regulation of protein phosphory...), GO:0002376 (immune system process), GO:0002520 (immune system development), GO:0002521 (leukocyte differentiation), GO:0006461 (protein complex assembly), GO:0006464 (c…
Aoah	NM_012054	1.22812	7.96347e-07	GO:0005975 (carbohydrate metabolic process), GO:0005976 (polysaccharide metabolic process), GO:0006629 (lipid metabolic process), GO:0006950 (response to stress), GO:0006952 (defense response), GO:0006954 (inflammatory response), GO:0008150 (biological_process), GO:0008152 (metabolic process), GO:0009605 (response to external stimulus), GO:0009987 (cellular process), GO:0031347 (regulation of def…
Rgag4	NM_001278534	1.32935	8.31158e-07	GO:0008150 (biological_process)
Gpr65	NM_008152	1.04393	8.82377e-07	GO:0006139 (nucleobase-containing compound metabolic...), GO:0006140 (regulation of nucleotide metabolic proce...), GO:0006163 (purine nucleotide metabolic process), GO:0006164 (purine nucleotide biosynthetic process), GO:0006171 (cAMP biosynthetic process), GO:0006725 (cellular aromatic compound metabolic pro...), GO:0006753 (nucleoside phosphate metabolic process), GO:0006793 (phosphorus metabo…
Aldh1b1	NM_028270	1.04566	9.59188e-07	GO:0008150 (biological_process), GO:0008152 (metabolic process), GO:0044699 (single-organism process), GO:0044710 (single-organism metabolic process), GO:0055114 (oxidation-reduction process)
Ly86	NM_010745	1.18261	1.05041e-06	GO:0002237 (response to molecule of bacterial origin), GO:0002376 (immune system process), GO:0002831 (regulation of response to biotic stimulu...), GO:0002833 (positive regulation of response to bioti...), GO:0006950 (response to stress), GO:0006952 (defense response), GO:0006954 (inflammatory response), GO:0006955 (immune response), GO:0007154 (cell communication), GO:0007165 (signal transducti…
Tmem221	NM_001100462	1.27524	1.31563e-06	GO:0008150 (biological_process)
Rassf4	NM_178045	1.22447	1.34142e-06	GO:0007049 (cell cycle), GO:0007154 (cell communication), GO:0007165 (signal transduction), GO:0008150 (biological_process), GO:0009987 (cellular process), GO:0023052 (signaling), GO:0044699 (single-organism process), GO:0044700 (single organism signaling), GO:0044763 (single-organism cellular process), GO:0050789 (regulation of biological process), GO:0050794 (regulation of cellular process), GO…
Vsir	NM_028732	1.00453	1.37061e-06	GO:0001775 (cell activation), GO:0001816 (cytokine production), GO:0001817 (regulation of cytokine production), GO:0001818 (negative regulation of cytokine producti...), GO:0002250 (adaptive immune response), GO:0002252 (immune effector process), GO:0002367 (cytokine production involved in immune r...), GO:0002369 (T cell cytokine production), GO:0002376 (immune system process), GO:0002440 (produ…
St8sia4	NM_009183	1.00193	1.37731e-06	GO:0001573 (ganglioside metabolic process), GO:0001574 (ganglioside biosynthetic process), GO:0005975 (carbohydrate metabolic process), GO:0006464 (cellular protein modification process), GO:0006486 (protein glycosylation), GO:0006491 (N-glycan processing), GO:0006629 (lipid metabolic process), GO:0006643 (membrane lipid metabolic process), GO:0006664 (glycolipid metabolic process), GO:0006665 (s…
B3galnt1	NM_020026	1.28628	1.38525e-06	GO:0005975 (carbohydrate metabolic process), GO:0006464 (cellular protein modification process), GO:0006486 (protein glycosylation), GO:0008150 (biological_process), GO:0008152 (metabolic process), GO:0009058 (biosynthetic process), GO:0009059 (macromolecule biosynthetic process), GO:0009100 (glycoprotein metabolic process), GO:0009101 (glycoprotein biosynthetic process), GO:0009311 (oligosacchar…
Clec2i	NM_020257	1.00694	1.41562e-06	GO:0001765 (membrane raft assembly), GO:0001771 (immunological synapse formation), GO:0001775 (cell activation), GO:0001816 (cytokine production), GO:0001817 (regulation of cytokine production), GO:0002253 (activation of immune response), GO:0002376 (immune system process), GO:0002429 (immune response-activating cell surface ...), GO:0002520 (immune system development), GO:0002521 (leukocyte diff…
Enpp2	NM_015744	1.03387	1.75864e-06	GO:0000902 (cell morphogenesis), GO:0000904 (cell morphogenesis involved in different...), GO:0001525 (angiogenesis), GO:0001568 (blood vessel development), GO:0001667 (ameboidal-type cell migration), GO:0001932 (regulation of protein phosphorylation), GO:0001934 (positive regulation of protein phosphory...), GO:0001944 (vasculature development), GO:0001952 (regulation of cell-matrix adhesion), G…
Vnn3	NM_011979	2.06106	2.39598e-06	GO:0006082 (organic acid metabolic process), GO:0006575 (cellular modified amino acid metabolic p...), GO:0006732 (coenzyme metabolic process), GO:0006766 (vitamin metabolic process), GO:0006767 (water-soluble vitamin metabolic process), GO:0006807 (nitrogen compound metabolic process), GO:0008150 (biological_process), GO:0008152 (metabolic process), GO:0009987 (cellular process), GO:0019752 (car…
Calcb	NM_054084	1.76196	2.64652e-06	GO:0008150 (biological_process)
Cybb	NM_007807	1.01021	3.14831e-06	GO:0001525 (angiogenesis), GO:0001568 (blood vessel development), GO:0001666 (response to hypoxia), GO:0001816 (cytokine production), GO:0001817 (regulation of cytokine production), GO:0001819 (positive regulation of cytokine producti...), GO:0001944 (vasculature development), GO:0002376 (immune system process), GO:0006801 (superoxide metabolic process), GO:0006810 (transport), GO:0006811 (ion tr…
Cd300a	NM_170758	1.30007	3.43073e-06	GO:0000165 (MAPK cascade), GO:0001775 (cell activation), GO:0001820 (serotonin secretion), GO:0001932 (regulation of protein phosphorylation), GO:0001933 (negative regulation of protein phosphory...), GO:0001934 (positive regulation of protein phosphory...), GO:0002218 (activation of innate immune response), GO:0002221 (pattern recognition receptor signaling p...), GO:0002224 (toll-like receptor …
Aif1	NM_019467	1.01836	3.43073e-06	GO:0000082 (G1/S transition of mitotic cell cycle), GO:0000278 (mitotic cell cycle), GO:0001774 (microglial cell activation), GO:0001775 (cell activation), GO:0001932 (regulation of protein phosphorylation), GO:0001934 (positive regulation of protein phosphory...), GO:0002274 (myeloid leukocyte activation), GO:0002376 (immune system process), GO:0002548 (monocyte chemotaxis), GO:0002682 (regulati…
Il16	NM_010551	1.21077	4.24635e-06	GO:0002376 (immune system process), GO:0006139 (nucleobase-containing compound metabolic...), GO:0006351 (transcription, DNA-templated), GO:0006355 (regulation of transcription, DNA-templat...), GO:0006725 (cellular aromatic compound metabolic pro...), GO:0006807 (nitrogen compound metabolic process), GO:0006810 (transport), GO:0006811 (ion transport), GO:0006812 (cation transport), GO:0006816 (c…
Gm1966	NM_001277179	1.00414	5.11318e-06	NA
Csf3r	NM_007782	1.0776	5.18848e-06	GO:0002376 (immune system process), GO:0002520 (immune system development), GO:0002682 (regulation of immune system process), GO:0006928 (movement of cell or subcellular componen...), GO:0006935 (chemotaxis), GO:0007155 (cell adhesion), GO:0007275 (multicellular organism development), GO:0008150 (biological_process), GO:0009605 (response to external stimulus), GO:0009987 (cellular process), GO:00…
Selenop	NM_009155	1.31106	7.69771e-06	GO:0000003 (reproduction), GO:0007275 (multicellular organism development), GO:0007399 (nervous system development), GO:0007417 (central nervous system development), GO:0007420 (brain development), GO:0007610 (behavior), GO:0007626 (locomotory behavior), GO:0008150 (biological_process), GO:0008152 (metabolic process), GO:0009791 (post-embryonic development), GO:0009987 (cellular process), GO:0019…
Fgl2	NM_008013	1.10452	7.78947e-06	GO:0008150 (biological_process), GO:0009987 (cellular process), GO:0019835 (cytolysis)
Lyl1	NM_008535	1.2613	8.33101e-06	GO:0001568 (blood vessel development), GO:0001775 (cell activation), GO:0001944 (vasculature development), GO:0001955 (blood vessel maturation), GO:0002376 (immune system process), GO:0002520 (immune system development), GO:0002521 (leukocyte differentiation), GO:0006139 (nucleobase-containing compound metabolic...), GO:0006351 (transcription, DNA-templated), GO:0006355 (regulation of transcripti…
P2ry12	NM_027571	1.11843	9.9129e-06	GO:0001775 (cell activation), GO:0001973 (adenosine receptor signaling pathway), GO:0002376 (immune system process), GO:0002682 (regulation of immune system process), GO:0002685 (regulation of leukocyte migration), GO:0006810 (transport), GO:0006811 (ion transport), GO:0006812 (cation transport), GO:0006813 (potassium ion transport), GO:0006816 (calcium ion transport), GO:0006928 (movement of cel…
Fcrls	NM_030707	1.81053	1.00193e-05	NA
Ipcef1	NM_001170800	1.29249	1.2303e-05	NA
Cdh26	NM_198656	1.02478	1.2303e-05	GO:0007155 (cell adhesion), GO:0007156 (homophilic cell adhesion via plasma memb...), GO:0008150 (biological_process), GO:0022610 (biological adhesion), GO:0098609 (cell-cell adhesion), GO:0098742 (cell-cell adhesion via plasma-membrane a...)
Fam26f	NM_175449	1.3912	1.3878e-05	GO:0006810 (transport), GO:0006811 (ion transport), GO:0008150 (biological_process), GO:0034220 (ion transmembrane transport), GO:0051179 (localization), GO:0051234 (establishment of localization), GO:0055085 (transmembrane transport)
Il12b	NM_001303244	1.47352	1.62193e-05	GO:0001562 (response to protozoan), GO:0001775 (cell activation), GO:0001787 (natural killer cell proliferation), GO:0001816 (cytokine production), GO:0001817 (regulation of cytokine production), GO:0001818 (negative regulation of cytokine producti...), GO:0001819 (positive regulation of cytokine producti...), GO:0001866 (NK T cell proliferation), GO:0001906 (cell killing), GO:0001909 (leukocyte …
Slc16a7	NM_011391	1.24646	1.74504e-05	GO:0006810 (transport), GO:0006811 (ion transport), GO:0006820 (anion transport), GO:0008150 (biological_process), GO:0015711 (organic anion transport), GO:0015718 (monocarboxylic acid transport), GO:0015727 (lactate transport), GO:0015849 (organic acid transport), GO:0015850 (organic hydroxy compound transport), GO:0034220 (ion transmembrane transport), GO:0035873 (lactate transmembrane transpor…
Fpr2	NM_008039	1.15646	1.78356e-05	GO:0002253 (activation of immune response), GO:0002376 (immune system process), GO:0002429 (immune response-activating cell surface ...), GO:0002430 (complement receptor mediated signaling p...), GO:0002682 (regulation of immune system process), GO:0002684 (positive regulation of immune system pro...), GO:0002757 (immune response-activating signal transd...), GO:0002764 (immune response-regulatin…
Tnfaip8l2	NM_027206	1.01083	1.9012e-05	GO:0001775 (cell activation), GO:0002376 (immune system process), GO:0002682 (regulation of immune system process), GO:0002683 (negative regulation of immune system pro...), GO:0002694 (regulation of leukocyte activation), GO:0002695 (negative regulation of leukocyte activat...), GO:0006950 (response to stress), GO:0006952 (defense response), GO:0006954 (inflammatory response), GO:0006955 (immune…
Siglece	NM_031181	1.45615	1.90446e-05	GO:0006810 (transport), GO:0006897 (endocytosis), GO:0006909 (phagocytosis), GO:0006911 (phagocytosis, engulfment), GO:0006950 (response to stress), GO:0006952 (defense response), GO:0006954 (inflammatory response), GO:0007155 (cell adhesion), GO:0008150 (biological_process), GO:0009605 (response to external stimulus), GO:0009987 (cellular process), GO:0010324 (membrane invagination), GO:0016043 …
Ptgds	NM_008963	2.294	1.93936e-05	GO:0000003 (reproduction), GO:0001516 (prostaglandin biosynthetic process), GO:0002176 (male germ cell proliferation), GO:0006082 (organic acid metabolic process), GO:0006629 (lipid metabolic process), GO:0006631 (fatty acid metabolic process), GO:0006633 (fatty acid biosynthetic process), GO:0006636 (unsaturated fatty acid biosynthetic proc...), GO:0006690 (icosanoid metabolic process), GO:00066…
Slc13a3	NM_054055	1.42356	1.98013e-05	GO:0006810 (transport), GO:0006811 (ion transport), GO:0006812 (cation transport), GO:0006814 (sodium ion transport), GO:0006820 (anion transport), GO:0006835 (dicarboxylic acid transport), GO:0006865 (amino acid transport), GO:0008150 (biological_process), GO:0015672 (monovalent inorganic cation transport), GO:0015711 (organic anion transport), GO:0015740 (C4-dicarboxylate transport), GO:0015800…
March1	NM_175188	1.08646	2.36935e-05	GO:0000209 (protein polyubiquitination), GO:0002376 (immune system process), GO:0002495 (antigen processing and presentation of p...), GO:0002504 (antigen processing and presentation of p...), GO:0006464 (cellular protein modification process), GO:0006955 (immune response), GO:0008150 (biological_process), GO:0008152 (metabolic process), GO:0009987 (cellular process), GO:0016567 (protein ubiquiti…
Clec4b1	NM_027218	1.44549	2.5347e-05	GO:0006810 (transport), GO:0006811 (ion transport), GO:0006812 (cation transport), GO:0006816 (calcium ion transport), GO:0006873 (cellular ion homeostasis), GO:0006874 (cellular calcium ion homeostasis), GO:0006875 (cellular metal ion homeostasis), GO:0007204 (positive regulation of cytosolic calcium...), GO:0008150 (biological_process), GO:0009987 (cellular process), GO:0010522 (regulation of c…
Abcg3	NM_030239	1.0215	2.88301e-05	GO:0006810 (transport), GO:0006855 (drug transmembrane transport), GO:0006869 (lipid transport), GO:0008150 (biological_process), GO:0010876 (lipid localization), GO:0015850 (organic hydroxy compound transport), GO:0015893 (drug transport), GO:0015918 (sterol transport), GO:0030301 (cholesterol transport), GO:0033036 (macromolecule localization), GO:0033344 (cholesterol efflux), GO:0042221 (respo…
Enpp4	NM_199016	1.08297	3.12242e-05	GO:0006139 (nucleobase-containing compound metabolic...), GO:0006152 (purine nucleoside catabolic process), GO:0006725 (cellular aromatic compound metabolic pro...), GO:0006807 (nitrogen compound metabolic process), GO:0006950 (response to stress), GO:0007596 (blood coagulation), GO:0007599 (hemostasis), GO:0008150 (biological_process), GO:0008152 (metabolic process), GO:0009056 (catabolic proces…
Arl5c	NM_207231	1.12921	3.37972e-05	GO:0007154 (cell communication), GO:0007165 (signal transduction), GO:0007264 (small GTPase mediated signal transductio...), GO:0008150 (biological_process), GO:0009987 (cellular process), GO:0023052 (signaling), GO:0035556 (intracellular signal transduction), GO:0044699 (single-organism process), GO:0044700 (single organism signaling), GO:0050789 (regulation of biological process), GO:0050794 (r…
Klra8	NM_010650	1.25423	4.03473e-05	GO:0007155 (cell adhesion), GO:0008150 (biological_process), GO:0009605 (response to external stimulus), GO:0009607 (response to biotic stimulus), GO:0009615 (response to virus), GO:0009987 (cellular process), GO:0016032 (viral process), GO:0022610 (biological adhesion), GO:0043207 (response to external biotic stimulus), GO:0044403 (symbiosis, encompassing mutualism throug...), GO:0044419 (inters…
Klra21	NM_053151	1.25008	4.20234e-05	GO:0008150 (biological_process)
Rcsd1	NM_178593	1.06742	4.59498e-05	GO:0006950 (response to stress), GO:0006970 (response to osmotic stress), GO:0006972 (hyperosmotic response), GO:0008150 (biological_process), GO:0009628 (response to abiotic stimulus), GO:0009987 (cellular process), GO:0033554 (cellular response to stress), GO:0050896 (response to stimulus), GO:0051716 (cellular response to stimulus), GO:0071214 (cellular response to abiotic stimulus), GO:007147…
Hpgds	NM_019455	1.19243	4.89503e-05	GO:0000003 (reproduction), GO:0001516 (prostaglandin biosynthetic process), GO:0002176 (male germ cell proliferation), GO:0006082 (organic acid metabolic process), GO:0006629 (lipid metabolic process), GO:0006631 (fatty acid metabolic process), GO:0006633 (fatty acid biosynthetic process), GO:0006636 (unsaturated fatty acid biosynthetic proc...), GO:0006690 (icosanoid metabolic process), GO:00066…
Ikzf3	NM_011771	1.05481	4.94775e-05	GO:0001775 (cell activation), GO:0002376 (immune system process), GO:0002520 (immune system development), GO:0002521 (leukocyte differentiation), GO:0002682 (regulation of immune system process), GO:0002694 (regulation of leukocyte activation), GO:0006139 (nucleobase-containing compound metabolic...), GO:0006351 (transcription, DNA-templated), GO:0006355 (regulation of transcription, DNA-templat.…
Ppfia4	NM_001144855	1.13524	5.01702e-05	GO:0008150 (biological_process)
Pou2f2	NM_011138	1.07688	5.23003e-05	GO:0001775 (cell activation), GO:0002250 (adaptive immune response), GO:0002252 (immune effector process), GO:0002335 (mature B cell differentiation), GO:0002376 (immune system process), GO:0002377 (immunoglobulin production), GO:0002381 (immunoglobulin production involved in im...), GO:0002440 (production of molecular mediator of immu...), GO:0002443 (leukocyte mediated immunity), GO:0002449 (ly…
Tigit	NM_001146325	1.15053	5.26822e-05	GO:0001775 (cell activation), GO:0001816 (cytokine production), GO:0001817 (regulation of cytokine production), GO:0001818 (negative regulation of cytokine producti...), GO:0001819 (positive regulation of cytokine producti...), GO:0002376 (immune system process), GO:0002682 (regulation of immune system process), GO:0002683 (negative regulation of immune system pro...), GO:0002694 (regulation of l…
Klra3	NM_010648	1.38906	6.2413e-05	NA
Cd7	NM_009854	1.64735	6.5246e-05	GO:0001894 (tissue homeostasis), GO:0002250 (adaptive immune response), GO:0002376 (immune system process), GO:0006955 (immune response), GO:0008150 (biological_process), GO:0032501 (multicellular organismal process), GO:0042592 (homeostatic process), GO:0044699 (single-organism process), GO:0044707 (single-multicellular organism process), GO:0048871 (multicellular organismal homeostasis), GO:004…
Kctd12	NM_177715	1.08611	6.764e-05	GO:0006461 (protein complex assembly), GO:0007154 (cell communication), GO:0007165 (signal transduction), GO:0007186 (G-protein coupled receptor signaling pat...), GO:0008150 (biological_process), GO:0008277 (regulation of G-protein coupled receptor...), GO:0009966 (regulation of signal transduction), GO:0009987 (cellular process), GO:0010646 (regulation of cell communication), GO:0016043 (cellul…
Klra17	NM_133203	1.86397	8.17586e-05	NA
I830077J02Rik	NM_001033780	1.03464	8.23646e-05	GO:0008150 (biological_process)
Tox	NM_145711	1.33716	8.6211e-05	NA
Fcgr4	NM_144559	1.17291	9.39369e-05	GO:0001775 (cell activation), GO:0001894 (tissue homeostasis), GO:0002237 (response to molecule of bacterial origin), GO:0002274 (myeloid leukocyte activation), GO:0002376 (immune system process), GO:0003008 (system process), GO:0007600 (sensory perception), GO:0008150 (biological_process), GO:0009605 (response to external stimulus), GO:0009607 (response to biotic stimulus), GO:0009617 (response …
Plbd1	NM_025806	1.01117	0.000101268	GO:0006629 (lipid metabolic process), GO:0008150 (biological_process), GO:0008152 (metabolic process), GO:0009056 (catabolic process), GO:0016042 (lipid catabolic process), GO:0044238 (primary metabolic process), GO:0044699 (single-organism process), GO:0044710 (single-organism metabolic process), GO:0044712 (single-organism catabolic process), GO:0071704 (organic substance metabolic process), GO…
Gimap3	NM_031247	1.05408	0.000129426	GO:0000002 (mitochondrial genome maintenance), GO:0000266 (mitochondrial fission), GO:0006996 (organelle organization), GO:0007005 (mitochondrion organization), GO:0008150 (biological_process), GO:0009987 (cellular process), GO:0016043 (cellular component organization), GO:0048285 (organelle fission), GO:0071840 (cellular component organization or bioge...)
B3gnt8	NM_146184	1.00293	0.000131806	GO:0000271 (polysaccharide biosynthetic process), GO:0005975 (carbohydrate metabolic process), GO:0005976 (polysaccharide metabolic process), GO:0006022 (aminoglycan metabolic process), GO:0006023 (aminoglycan biosynthetic process), GO:0006464 (cellular protein modification process), GO:0006486 (protein glycosylation), GO:0006807 (nitrogen compound metabolic process), GO:0008150 (biological_proce…
Gpr31b	NM_001013832	1.24991	0.000134931	GO:0007154 (cell communication), GO:0007165 (signal transduction), GO:0007186 (G-protein coupled receptor signaling pat...), GO:0008150 (biological_process), GO:0009987 (cellular process), GO:0023052 (signaling), GO:0044699 (single-organism process), GO:0044700 (single organism signaling), GO:0050789 (regulation of biological process), GO:0050794 (regulation of cellular process), GO:0050896 (resp…
Syt13	NM_030725	1.20134	0.000135339	GO:0001505 (regulation of neurotransmitter levels), GO:0006810 (transport), GO:0006836 (neurotransmitter transport), GO:0006887 (exocytosis), GO:0006906 (vesicle fusion), GO:0006996 (organelle organization), GO:0007154 (cell communication), GO:0007267 (cell-cell signaling), GO:0007268 (chemical synaptic transmission), GO:0007269 (neurotransmitter secretion), GO:0008150 (biological_process), GO:00…
Arhgap15	NM_153820	1.02917	0.000148425	GO:0000902 (cell morphogenesis), GO:0007154 (cell communication), GO:0007165 (signal transduction), GO:0008150 (biological_process), GO:0008360 (regulation of cell shape), GO:0009653 (anatomical structure morphogenesis), GO:0009987 (cellular process), GO:0016043 (cellular component organization), GO:0022603 (regulation of anatomical structure morph...), GO:0022604 (regulation of cell morphogenesi…
Sirpb1a	NM_001002898	1.12405	0.000222929	GO:0006810 (transport), GO:0006897 (endocytosis), GO:0006909 (phagocytosis), GO:0007154 (cell communication), GO:0007165 (signal transduction), GO:0008150 (biological_process), GO:0009987 (cellular process), GO:0016043 (cellular component organization), GO:0016192 (vesicle-mediated transport), GO:0023052 (signaling), GO:0030100 (regulation of endocytosis), GO:0032879 (regulation of localization),…
Batf3	NM_030060	1.0033	0.000272636	GO:0000122 (negative regulation of transcription fro...), GO:0001773 (myeloid dendritic cell activation), GO:0001775 (cell activation), GO:0002274 (myeloid leukocyte activation), GO:0002376 (immune system process), GO:0002520 (immune system development), GO:0002521 (leukocyte differentiation), GO:0002573 (myeloid leukocyte differentiation), GO:0006139 (nucleobase-containing compound metabolic...)…
Mmp25	NM_001033339	1.07767	0.000332457	GO:0006508 (proteolysis), GO:0006950 (response to stress), GO:0006952 (defense response), GO:0006954 (inflammatory response), GO:0008150 (biological_process), GO:0008152 (metabolic process), GO:0019538 (protein metabolic process), GO:0032502 (developmental process), GO:0043170 (macromolecule metabolic process), GO:0044238 (primary metabolic process), GO:0044699 (single-organism process), GO:00447…
Klrb1f	NM_153094	1.14383	0.000371972	GO:0008150 (biological_process)
Slc9a7	NM_177353	1.22655	0.000440472	GO:0006810 (transport), GO:0006811 (ion transport), GO:0006812 (cation transport), GO:0006813 (potassium ion transport), GO:0006814 (sodium ion transport), GO:0006873 (cellular ion homeostasis), GO:0006885 (regulation of pH), GO:0008150 (biological_process), GO:0009987 (cellular process), GO:0015672 (monovalent inorganic cation transport), GO:0019725 (cellular homeostasis), GO:0030001 (metal ion …
Gpr160	NM_027965	1.18654	0.000440516	GO:0007154 (cell communication), GO:0007165 (signal transduction), GO:0007186 (G-protein coupled receptor signaling pat...), GO:0008150 (biological_process), GO:0009987 (cellular process), GO:0023052 (signaling), GO:0044699 (single-organism process), GO:0044700 (single organism signaling), GO:0050789 (regulation of biological process), GO:0050794 (regulation of cellular process), GO:0050896 (resp…
Rnf144b	NM_146042	1.44983	0.000441014	GO:0000209 (protein polyubiquitination), GO:0006464 (cellular protein modification process), GO:0006508 (proteolysis), GO:0006511 (ubiquitin-dependent protein catabolic pr...), GO:0006915 (apoptotic process), GO:0008150 (biological_process), GO:0008152 (metabolic process), GO:0008219 (cell death), GO:0009056 (catabolic process), GO:0009057 (macromolecule catabolic process), GO:0009893 (positive r…
Lilra5	NM_001081239	1.24209	0.000470317	GO:0008150 (biological_process)
Cd79b	NM_008339	1.07531	0.000596777	GO:0001775 (cell activation), GO:0002250 (adaptive immune response), GO:0002253 (activation of immune response), GO:0002376 (immune system process), GO:0002429 (immune response-activating cell surface ...), GO:0002520 (immune system development), GO:0002521 (leukocyte differentiation), GO:0002682 (regulation of immune system process), GO:0002684 (positive regulation of immune system pro...), GO:0…
Cd226	NM_178687	1.04688	0.000675037	GO:0001775 (cell activation), GO:0001816 (cytokine production), GO:0001817 (regulation of cytokine production), GO:0001819 (positive regulation of cytokine producti...), GO:0001906 (cell killing), GO:0001909 (leukocyte mediated cytotoxicity), GO:0001910 (regulation of leukocyte mediated cytotox...), GO:0001912 (positive regulation of leukocyte mediate...), GO:0002228 (natural killer cell mediated…
Il18r1	NM_008365	1.10785	0.000718219	GO:0001775 (cell activation), GO:0001816 (cytokine production), GO:0001817 (regulation of cytokine production), GO:0001819 (positive regulation of cytokine producti...), GO:0002250 (adaptive immune response), GO:0002252 (immune effector process), GO:0002263 (cell activation involved in immune respo...), GO:0002285 (lymphocyte activation involved in immune...), GO:0002286 (T cell activation involv…
Klra9	NM_010651	1.13367	0.000744726	NA
Kmo	NM_133809	1.10606	0.000777739	GO:0006082 (organic acid metabolic process), GO:0006139 (nucleobase-containing compound metabolic...), GO:0006520 (cellular amino acid metabolic process), GO:0006568 (tryptophan metabolic process), GO:0006569 (tryptophan catabolic process), GO:0006576 (cellular biogenic amine metabolic proces...), GO:0006586 (indolalkylamine metabolic process), GO:0006725 (cellular aromatic compound metabolic pro…
Klrc1	NM_010652	1.02142	0.000790005	NA
Cd5	NM_007650	1.16116	0.000800766	GO:0001775 (cell activation), GO:0002376 (immune system process), GO:0002682 (regulation of immune system process), GO:0002684 (positive regulation of immune system pro...), GO:0002694 (regulation of leukocyte activation), GO:0002696 (positive regulation of leukocyte activat...), GO:0006915 (apoptotic process), GO:0007154 (cell communication), GO:0007155 (cell adhesion), GO:0007159 (leukocyte cel…

## Sheet: day9_Top100.UP.DEGs
Table S1d. The top 100 most significantly differentially upregulated genes between Vehicle and RXDX-106 treated MC83 mice at day 9 (ranked by FDR). Statistical significance was defined as |log2FC|>1, FDR<0.01 and FPKM>1 in 2 or more samples within the contrasting groups. 51/100 (51%) of the most significantly upregulated genes at day 9 annotate to an immunological GO term as indicated in the yell…
SYMBOL	REFSEQ	logFC	FDR	GO.ID
Ly9	NM_008534	1.08163	1.95198e-11	GO:0001775 (cell activation), GO:0001816 (cytokine production), GO:0001817 (regulation of cytokine production), GO:0001819 (positive regulation of cytokine producti...), GO:0002250 (adaptive immune response), GO:0002252 (immune effector process), GO:0002263 (cell activation involved in immune respo...), GO:0002285 (lymphocyte activation involved in immune...), GO:0002286 (T cell activation involv…
Fpr1	NM_013521	1.63395	4.33915e-10	GO:0002253 (activation of immune response), GO:0002376 (immune system process), GO:0002429 (immune response-activating cell surface ...), GO:0002430 (complement receptor mediated signaling p...), GO:0002682 (regulation of immune system process), GO:0002684 (positive regulation of immune system pro...), GO:0002757 (immune response-activating signal transd...), GO:0002764 (immune response-regulatin…
Tlr7	NM_133211	1.15335	1.13893e-09	GO:0001774 (microglial cell activation), GO:0001775 (cell activation), GO:0001816 (cytokine production), GO:0001817 (regulation of cytokine production), GO:0001819 (positive regulation of cytokine producti...), GO:0001932 (regulation of protein phosphorylation), GO:0002218 (activation of innate immune response), GO:0002221 (pattern recognition receptor signaling p...), GO:0002224 (toll-like recep…
Fmod	NM_021355	1.92315	8.25998e-09	NA
Adgre1	NM_010130	1.12262	1.33565e-08	GO:0002250 (adaptive immune response), GO:0002376 (immune system process), GO:0006955 (immune response), GO:0007154 (cell communication), GO:0007165 (signal transduction), GO:0007166 (cell surface receptor signaling pathway), GO:0007186 (G-protein coupled receptor signaling pat...), GO:0008150 (biological_process), GO:0009987 (cellular process), GO:0023052 (signaling), GO:0044699 (single-organism…
Cd22	NM_009845	1.21131	3.30056e-08	GO:0007154 (cell communication), GO:0007155 (cell adhesion), GO:0007165 (signal transduction), GO:0007166 (cell surface receptor signaling pathway), GO:0008150 (biological_process), GO:0009987 (cellular process), GO:0022610 (biological adhesion), GO:0023052 (signaling), GO:0044699 (single-organism process), GO:0044700 (single organism signaling), GO:0050789 (regulation of biological process), GO:…
Lst1	NM_010734	1.17772	2.81089e-07	GO:0000902 (cell morphogenesis), GO:0001775 (cell activation), GO:0002376 (immune system process), GO:0002682 (regulation of immune system process), GO:0002694 (regulation of leukocyte activation), GO:0006955 (immune response), GO:0007275 (multicellular organism development), GO:0007399 (nervous system development), GO:0008150 (biological_process), GO:0008283 (cell proliferation), GO:0008360 (reg…
Tlr1	NM_030682	1.36878	6.24716e-07	GO:0001774 (microglial cell activation), GO:0001775 (cell activation), GO:0001816 (cytokine production), GO:0001817 (regulation of cytokine production), GO:0001819 (positive regulation of cytokine producti...), GO:0001932 (regulation of protein phosphorylation), GO:0001934 (positive regulation of protein phosphory...), GO:0002218 (activation of innate immune response), GO:0002221 (pattern recogni…
Adap2	NM_172133	1.03911	6.26811e-07	GO:0007154 (cell communication), GO:0007165 (signal transduction), GO:0007275 (multicellular organism development), GO:0007507 (heart development), GO:0008150 (biological_process), GO:0009987 (cellular process), GO:0023052 (signaling), GO:0032501 (multicellular organismal process), GO:0032502 (developmental process), GO:0035556 (intracellular signal transduction), GO:0044699 (single-organism proc…
Mertk	NM_008587	1.12552	6.59868e-07	GO:0000003 (reproduction), GO:0000902 (cell morphogenesis), GO:0000904 (cell morphogenesis involved in different...), GO:0001654 (eye development), GO:0001775 (cell activation), GO:0001776 (leukocyte homeostasis), GO:0001779 (natural killer cell differentiation), GO:0001780 (neutrophil homeostasis), GO:0001816 (cytokine production), GO:0001817 (regulation of cytokine production), GO:0001818 (nega…
Csf3r	NM_007782	1.32615	8.71512e-07	GO:0002376 (immune system process), GO:0002520 (immune system development), GO:0002682 (regulation of immune system process), GO:0006928 (movement of cell or subcellular componen...), GO:0006935 (chemotaxis), GO:0007155 (cell adhesion), GO:0007275 (multicellular organism development), GO:0008150 (biological_process), GO:0009605 (response to external stimulus), GO:0009987 (cellular process), GO:00…
Klk1	NM_010639	1.73789	1.53071e-06	GO:0006508 (proteolysis), GO:0008150 (biological_process), GO:0008152 (metabolic process), GO:0019538 (protein metabolic process), GO:0043170 (macromolecule metabolic process), GO:0044238 (primary metabolic process), GO:0071704 (organic substance metabolic process)
Gm21188	NM_001302966	1.2149	2.28938e-06	NA
Tlr8	NM_133212	1.10086	2.33653e-06	GO:0001774 (microglial cell activation), GO:0001775 (cell activation), GO:0001816 (cytokine production), GO:0001817 (regulation of cytokine production), GO:0001818 (negative regulation of cytokine producti...), GO:0001819 (positive regulation of cytokine producti...), GO:0001932 (regulation of protein phosphorylation), GO:0002218 (activation of innate immune response), GO:0002221 (pattern recogni…
Ebi3	NM_015766	1.21308	2.94323e-06	GO:0001775 (cell activation), GO:0002376 (immune system process), GO:0008150 (biological_process), GO:0008283 (cell proliferation), GO:0009987 (cellular process), GO:0032943 (mononuclear cell proliferation), GO:0042098 (T cell proliferation), GO:0042110 (T cell activation), GO:0044699 (single-organism process), GO:0044763 (single-organism cellular process), GO:0045321 (leukocyte activation), GO:0…
Inpp5j	NM_172439	1.29199	4.28043e-06	GO:0000226 (microtubule cytoskeleton organization), GO:0001932 (regulation of protein phosphorylation), GO:0001933 (negative regulation of protein phosphory...), GO:0006461 (protein complex assembly), GO:0006464 (cellular protein modification process), GO:0006468 (protein phosphorylation), GO:0006629 (lipid metabolic process), GO:0006644 (phospholipid metabolic process), GO:0006650 (glycerophosph…
Itga4	NM_010576	1.15524	4.45392e-06	GO:0000003 (reproduction), GO:0000902 (cell morphogenesis), GO:0000904 (cell morphogenesis involved in different...), GO:0001667 (ameboidal-type cell migration), GO:0001701 (in utero embryonic development), GO:0001890 (placenta development), GO:0001892 (embryonic placenta development), GO:0001974 (blood vessel remodeling), GO:0002376 (immune system process), GO:0002682 (regulation of immune syste…
Prex1	NM_177782	1.0702	4.46697e-06	GO:0000902 (cell morphogenesis), GO:0000904 (cell morphogenesis involved in different...), GO:0001775 (cell activation), GO:0001932 (regulation of protein phosphorylation), GO:0001933 (negative regulation of protein phosphory...), GO:0002376 (immune system process), GO:0002520 (immune system development), GO:0002521 (leukocyte differentiation), GO:0006461 (protein complex assembly), GO:0006464 (c…
Gpr65	NM_008152	1.11278	4.79381e-06	GO:0006139 (nucleobase-containing compound metabolic...), GO:0006140 (regulation of nucleotide metabolic proce...), GO:0006163 (purine nucleotide metabolic process), GO:0006164 (purine nucleotide biosynthetic process), GO:0006171 (cAMP biosynthetic process), GO:0006725 (cellular aromatic compound metabolic pro...), GO:0006753 (nucleoside phosphate metabolic process), GO:0006793 (phosphorus metabo…
Gm1966	NM_001277179	1.1471	5.04703e-06	NA
Tox	NM_145711	1.73694	7.17754e-06	NA
Tlr9	NM_031178	1.13123	7.17754e-06	GO:0000165 (MAPK cascade), GO:0000902 (cell morphogenesis), GO:0000904 (cell morphogenesis involved in different...), GO:0001774 (microglial cell activation), GO:0001775 (cell activation), GO:0001816 (cytokine production), GO:0001817 (regulation of cytokine production), GO:0001818 (negative regulation of cytokine producti...), GO:0001819 (positive regulation of cytokine producti...), GO:0001894 (…
Sirpa	NM_007547	1.00012	7.17754e-06	GO:0002244 (hematopoietic progenitor cell differenti...), GO:0002376 (immune system process), GO:0002520 (immune system development), GO:0006810 (transport), GO:0006897 (endocytosis), GO:0006909 (phagocytosis), GO:0006910 (phagocytosis, recognition), GO:0006911 (phagocytosis, engulfment), GO:0006928 (movement of cell or subcellular componen...), GO:0006996 (organelle organization), GO:0007010 (cy…
Neurl3	NM_153408	1.00272	7.22126e-06	GO:0006464 (cellular protein modification process), GO:0008150 (biological_process), GO:0008152 (metabolic process), GO:0009987 (cellular process), GO:0016567 (protein ubiquitination), GO:0019538 (protein metabolic process), GO:0032446 (protein modification by small protein co...), GO:0036211 (protein modification process), GO:0043170 (macromolecule metabolic process), GO:0043412 (macromolecule m…
Klra2	NM_008462	1.18435	1.02497e-05	GO:0007155 (cell adhesion), GO:0008150 (biological_process), GO:0022610 (biological adhesion)
Cd300a	NM_170758	1.38848	1.41172e-05	GO:0000165 (MAPK cascade), GO:0001775 (cell activation), GO:0001820 (serotonin secretion), GO:0001932 (regulation of protein phosphorylation), GO:0001933 (negative regulation of protein phosphory...), GO:0001934 (positive regulation of protein phosphory...), GO:0002218 (activation of innate immune response), GO:0002221 (pattern recognition receptor signaling p...), GO:0002224 (toll-like receptor …
Apoe	NM_009696	1.31061	2.01704e-05	GO:0000165 (MAPK cascade), GO:0000902 (cell morphogenesis), GO:0000904 (cell morphogenesis involved in different...), GO:0001558 (regulation of cell growth), GO:0001568 (blood vessel development), GO:0001667 (ameboidal-type cell migration), GO:0001775 (cell activation), GO:0001932 (regulation of protein phosphorylation), GO:0001933 (negative regulation of protein phosphory...), GO:0001935 (endoth…
Lpcat2	NM_173014	1.1142	2.01704e-05	GO:0006629 (lipid metabolic process), GO:0006644 (phospholipid metabolic process), GO:0006650 (glycerophospholipid metabolic process), GO:0006793 (phosphorus metabolic process), GO:0006796 (phosphate-containing compound metabolic ...), GO:0006807 (nitrogen compound metabolic process), GO:0008150 (biological_process), GO:0008152 (metabolic process), GO:0008610 (lipid biosynthetic process), GO:0008…
Cd300c2	NM_134158	1.02435	2.01704e-05	GO:0001816 (cytokine production), GO:0001817 (regulation of cytokine production), GO:0001819 (positive regulation of cytokine producti...), GO:0002376 (immune system process), GO:0002790 (peptide secretion), GO:0002791 (regulation of peptide secretion), GO:0002793 (positive regulation of peptide secretion), GO:0006810 (transport), GO:0008104 (protein localization), GO:0008150 (biological_process)…
P2ry13	NM_028808	1.23318	2.26274e-05	GO:0006139 (nucleobase-containing compound metabolic...), GO:0006140 (regulation of nucleotide metabolic proce...), GO:0006163 (purine nucleotide metabolic process), GO:0006164 (purine nucleotide biosynthetic process), GO:0006171 (cAMP biosynthetic process), GO:0006725 (cellular aromatic compound metabolic pro...), GO:0006753 (nucleoside phosphate metabolic process), GO:0006793 (phosphorus metabo…
Gpr31b	NM_001013832	1.55885	2.4837e-05	GO:0007154 (cell communication), GO:0007165 (signal transduction), GO:0007186 (G-protein coupled receptor signaling pat...), GO:0008150 (biological_process), GO:0009987 (cellular process), GO:0023052 (signaling), GO:0044699 (single-organism process), GO:0044700 (single organism signaling), GO:0050789 (regulation of biological process), GO:0050794 (regulation of cellular process), GO:0050896 (resp…
Hacd4	NM_025760	1.07471	2.51793e-05	GO:0000038 (very long-chain fatty acid metabolic pro...), GO:0006082 (organic acid metabolic process), GO:0006629 (lipid metabolic process), GO:0006631 (fatty acid metabolic process), GO:0006633 (fatty acid biosynthetic process), GO:0008150 (biological_process), GO:0008152 (metabolic process), GO:0008610 (lipid biosynthetic process), GO:0009058 (biosynthetic process), GO:0009987 (cellular process…
Ppfia4	NM_001144855	1.31072	3.82784e-05	GO:0008150 (biological_process)
Cybb	NM_007807	1.02363	4.12319e-05	GO:0001525 (angiogenesis), GO:0001568 (blood vessel development), GO:0001666 (response to hypoxia), GO:0001816 (cytokine production), GO:0001817 (regulation of cytokine production), GO:0001819 (positive regulation of cytokine producti...), GO:0001944 (vasculature development), GO:0002376 (immune system process), GO:0006801 (superoxide metabolic process), GO:0006810 (transport), GO:0006811 (ion tr…
Themis2	NM_001033308	1.01555	4.5485e-05	GO:0002253 (activation of immune response), GO:0002376 (immune system process), GO:0002429 (immune response-activating cell surface ...), GO:0002682 (regulation of immune system process), GO:0002684 (positive regulation of immune system pro...), GO:0002757 (immune response-activating signal transd...), GO:0002764 (immune response-regulating signaling pat...), GO:0002768 (immune response-regulatin…
Clec4a2	NM_011999	1.06875	4.73588e-05	GO:0002250 (adaptive immune response), GO:0002376 (immune system process), GO:0006950 (response to stress), GO:0006952 (defense response), GO:0006955 (immune response), GO:0008150 (biological_process), GO:0045087 (innate immune response), GO:0050896 (response to stimulus)
Igsf6	NM_030691	1.01802	4.73588e-05	GO:0008150 (biological_process)
Arl5c	NM_207231	1.26126	5.05298e-05	GO:0007154 (cell communication), GO:0007165 (signal transduction), GO:0007264 (small GTPase mediated signal transductio...), GO:0008150 (biological_process), GO:0009987 (cellular process), GO:0023052 (signaling), GO:0035556 (intracellular signal transduction), GO:0044699 (single-organism process), GO:0044700 (single organism signaling), GO:0050789 (regulation of biological process), GO:0050794 (r…
Tigit	NM_001146325	1.31064	5.42343e-05	GO:0001775 (cell activation), GO:0001816 (cytokine production), GO:0001817 (regulation of cytokine production), GO:0001818 (negative regulation of cytokine producti...), GO:0001819 (positive regulation of cytokine producti...), GO:0002376 (immune system process), GO:0002682 (regulation of immune system process), GO:0002683 (negative regulation of immune system pro...), GO:0002694 (regulation of l…
Rassf4	NM_178045	1.17715	5.42343e-05	GO:0007049 (cell cycle), GO:0007154 (cell communication), GO:0007165 (signal transduction), GO:0008150 (biological_process), GO:0009987 (cellular process), GO:0023052 (signaling), GO:0044699 (single-organism process), GO:0044700 (single organism signaling), GO:0044763 (single-organism cellular process), GO:0050789 (regulation of biological process), GO:0050794 (regulation of cellular process), GO…
Clec4a1	NM_199311	1.1241	5.42343e-05	GO:0008150 (biological_process)
Sorl1	NM_011436	1.09837	5.42343e-05	GO:0000042 (protein targeting to Golgi), GO:0000165 (MAPK cascade), GO:0000301 (retrograde transport, vesicle recycling ...), GO:0001932 (regulation of protein phosphorylation), GO:0001933 (negative regulation of protein phosphory...), GO:0006066 (alcohol metabolic process), GO:0006461 (protein complex assembly), GO:0006464 (cellular protein modification process), GO:0006468 (protein phosphorylat…
Syk	NM_011518	1.01156	5.42343e-05	GO:0000165 (MAPK cascade), GO:0000187 (activation of MAPK activity), GO:0001525 (angiogenesis), GO:0001568 (blood vessel development), GO:0001775 (cell activation), GO:0001816 (cytokine production), GO:0001817 (regulation of cytokine production), GO:0001819 (positive regulation of cytokine producti...), GO:0001820 (serotonin secretion), GO:0001894 (tissue homeostasis), GO:0001932 (regulation of p…
Clec4a3	NM_153197	1.20487	6.02158e-05	GO:0008150 (biological_process)
Aif1	NM_019467	1.01089	6.18053e-05	GO:0000082 (G1/S transition of mitotic cell cycle), GO:0000278 (mitotic cell cycle), GO:0001774 (microglial cell activation), GO:0001775 (cell activation), GO:0001932 (regulation of protein phosphorylation), GO:0001934 (positive regulation of protein phosphory...), GO:0002274 (myeloid leukocyte activation), GO:0002376 (immune system process), GO:0002548 (monocyte chemotaxis), GO:0002682 (regulati…
Aoah	NM_012054	1.13993	6.6219e-05	GO:0005975 (carbohydrate metabolic process), GO:0005976 (polysaccharide metabolic process), GO:0006629 (lipid metabolic process), GO:0006950 (response to stress), GO:0006952 (defense response), GO:0006954 (inflammatory response), GO:0008150 (biological_process), GO:0008152 (metabolic process), GO:0009605 (response to external stimulus), GO:0009987 (cellular process), GO:0031347 (regulation of def…
Ly86	NM_010745	1.10959	6.903e-05	GO:0002237 (response to molecule of bacterial origin), GO:0002376 (immune system process), GO:0002831 (regulation of response to biotic stimulu...), GO:0002833 (positive regulation of response to bioti...), GO:0006950 (response to stress), GO:0006952 (defense response), GO:0006954 (inflammatory response), GO:0006955 (immune response), GO:0007154 (cell communication), GO:0007165 (signal transducti…
B3galnt1	NM_020026	1.2195	7.50276e-05	GO:0005975 (carbohydrate metabolic process), GO:0006464 (cellular protein modification process), GO:0006486 (protein glycosylation), GO:0008150 (biological_process), GO:0008152 (metabolic process), GO:0009058 (biosynthetic process), GO:0009059 (macromolecule biosynthetic process), GO:0009100 (glycoprotein metabolic process), GO:0009101 (glycoprotein biosynthetic process), GO:0009311 (oligosacchar…
Calcb	NM_054084	1.65792	9.88464e-05	GO:0008150 (biological_process)
Il10ra	NM_008348	1.03584	0.000124653	GO:0008150 (biological_process), GO:0009987 (cellular process), GO:0016043 (cellular component organization), GO:0044699 (single-organism process), GO:0044763 (single-organism cellular process), GO:0050789 (regulation of biological process), GO:0050794 (regulation of cellular process), GO:0050803 (regulation of synapse structure or activ...), GO:0050807 (regulation of synapse organization), GO:00…
Lyl1	NM_008535	1.2336	0.000149245	GO:0001568 (blood vessel development), GO:0001775 (cell activation), GO:0001944 (vasculature development), GO:0001955 (blood vessel maturation), GO:0002376 (immune system process), GO:0002520 (immune system development), GO:0002521 (leukocyte differentiation), GO:0006139 (nucleobase-containing compound metabolic...), GO:0006351 (transcription, DNA-templated), GO:0006355 (regulation of transcripti…
Gm9733	NM_001076679	1.36332	0.000183768	GO:0008150 (biological_process)
Cx3cr1	NM_009987	1.10051	0.000210478	GO:0001525 (angiogenesis), GO:0001568 (blood vessel development), GO:0001774 (microglial cell activation), GO:0001775 (cell activation), GO:0001944 (vasculature development), GO:0002052 (positive regulation of neuroblast prolif...), GO:0002252 (immune effector process), GO:0002263 (cell activation involved in immune respo...), GO:0002274 (myeloid leukocyte activation), GO:0002275 (myeloid cell ac…
Pou2f2	NM_011138	1.1296	0.000220212	GO:0001775 (cell activation), GO:0002250 (adaptive immune response), GO:0002252 (immune effector process), GO:0002335 (mature B cell differentiation), GO:0002376 (immune system process), GO:0002377 (immunoglobulin production), GO:0002381 (immunoglobulin production involved in im...), GO:0002440 (production of molecular mediator of immu...), GO:0002443 (leukocyte mediated immunity), GO:0002449 (ly…
Il16	NM_010551	1.12481	0.000221835	GO:0002376 (immune system process), GO:0006139 (nucleobase-containing compound metabolic...), GO:0006351 (transcription, DNA-templated), GO:0006355 (regulation of transcription, DNA-templat...), GO:0006725 (cellular aromatic compound metabolic pro...), GO:0006807 (nitrogen compound metabolic process), GO:0006810 (transport), GO:0006811 (ion transport), GO:0006812 (cation transport), GO:0006816 (c…
Fpr2	NM_008039	1.14369	0.000228881	GO:0002253 (activation of immune response), GO:0002376 (immune system process), GO:0002429 (immune response-activating cell surface ...), GO:0002430 (complement receptor mediated signaling p...), GO:0002682 (regulation of immune system process), GO:0002684 (positive regulation of immune system pro...), GO:0002757 (immune response-activating signal transd...), GO:0002764 (immune response-regulatin…
Klrc2	NM_010653	1.21683	0.000234591	NA
Ipcef1	NM_001170800	1.24756	0.000235838	NA
Siglece	NM_031181	1.42495	0.00025923	GO:0006810 (transport), GO:0006897 (endocytosis), GO:0006909 (phagocytosis), GO:0006911 (phagocytosis, engulfment), GO:0006950 (response to stress), GO:0006952 (defense response), GO:0006954 (inflammatory response), GO:0007155 (cell adhesion), GO:0008150 (biological_process), GO:0009605 (response to external stimulus), GO:0009987 (cellular process), GO:0010324 (membrane invagination), GO:0016043 …
Cacna1d	NM_028981	1.00651	0.000301199	GO:0001508 (action potential), GO:0002027 (regulation of heart rate), GO:0003008 (system process), GO:0003012 (muscle system process), GO:0003013 (circulatory system process), GO:0003015 (heart process), GO:0006139 (nucleobase-containing compound metabolic...), GO:0006351 (transcription, DNA-templated), GO:0006355 (regulation of transcription, DNA-templat...), GO:0006725 (cellular aromatic compou…
Gm156	NM_001014997	2.57007	0.000333174	GO:0008150 (biological_process)
Rasal3	NM_178785	1.01259	0.000358733	GO:0001775 (cell activation), GO:0001866 (NK T cell proliferation), GO:0002376 (immune system process), GO:0002682 (regulation of immune system process), GO:0002684 (positive regulation of immune system pro...), GO:0002694 (regulation of leukocyte activation), GO:0002696 (positive regulation of leukocyte activat...), GO:0007154 (cell communication), GO:0007155 (cell adhesion), GO:0007159 (leukocy…
Fam26f	NM_175449	1.31103	0.000385046	GO:0006810 (transport), GO:0006811 (ion transport), GO:0008150 (biological_process), GO:0034220 (ion transmembrane transport), GO:0051179 (localization), GO:0051234 (establishment of localization), GO:0055085 (transmembrane transport)
Prkcb	NM_008855	1.0397	0.000399247	GO:0001525 (angiogenesis), GO:0001568 (blood vessel development), GO:0001666 (response to hypoxia), GO:0001775 (cell activation), GO:0001944 (vasculature development), GO:0002250 (adaptive immune response), GO:0002253 (activation of immune response), GO:0002376 (immune system process), GO:0002429 (immune response-activating cell surface ...), GO:0002682 (regulation of immune system process), GO:0…
Ikzf3	NM_011771	1.06047	0.000402933	GO:0001775 (cell activation), GO:0002376 (immune system process), GO:0002520 (immune system development), GO:0002521 (leukocyte differentiation), GO:0002682 (regulation of immune system process), GO:0002694 (regulation of leukocyte activation), GO:0006139 (nucleobase-containing compound metabolic...), GO:0006351 (transcription, DNA-templated), GO:0006355 (regulation of transcription, DNA-templat.…
Fgd2	NM_013710	1.10546	0.000423102	GO:0000165 (MAPK cascade), GO:0001932 (regulation of protein phosphorylation), GO:0001934 (positive regulation of protein phosphory...), GO:0006464 (cellular protein modification process), GO:0006468 (protein phosphorylation), GO:0006793 (phosphorus metabolic process), GO:0006796 (phosphate-containing compound metabolic ...), GO:0006950 (response to stress), GO:0007154 (cell communication), GO:00…
Plxdc1	NM_028199	1.07805	0.000425264	GO:0001525 (angiogenesis), GO:0001568 (blood vessel development), GO:0001944 (vasculature development), GO:0007275 (multicellular organism development), GO:0008150 (biological_process), GO:0009653 (anatomical structure morphogenesis), GO:0032501 (multicellular organismal process), GO:0032502 (developmental process), GO:0044699 (single-organism process), GO:0044707 (single-multicellular organism p…
Chga	NM_007693	1.67501	0.000425543	GO:0001775 (cell activation), GO:0001816 (cytokine production), GO:0002026 (regulation of the force of heart contrac...), GO:0002252 (immune effector process), GO:0002263 (cell activation involved in immune respo...), GO:0002274 (myeloid leukocyte activation), GO:0002275 (myeloid cell activation involved in immu...), GO:0002279 (mast cell activation involved in immune ...), GO:0002366 (leukocyte …
Disc1	NM_174854	1.05098	0.000525698	GO:0000226 (microtubule cytoskeleton organization), GO:0000902 (cell morphogenesis), GO:0000904 (cell morphogenesis involved in different...), GO:0001558 (regulation of cell growth), GO:0001764 (neuron migration), GO:0001952 (regulation of cell-matrix adhesion), GO:0001954 (positive regulation of cell-matrix adhes...), GO:0002052 (positive regulation of neuroblast prolif...), GO:0006464 (cellular…
Rgag4	NM_001278534	1.08601	0.000553466	GO:0008150 (biological_process)
Adgre5	NM_001163029	1.01051	0.000553466	GO:0007154 (cell communication), GO:0007155 (cell adhesion), GO:0007165 (signal transduction), GO:0007166 (cell surface receptor signaling pathway), GO:0007186 (G-protein coupled receptor signaling pat...), GO:0007275 (multicellular organism development), GO:0007399 (nervous system development), GO:0007416 (synapse assembly), GO:0008150 (biological_process), GO:0009987 (cellular process), GO:0016…
Nlrp1b	NM_001162414	1.17534	0.000559929	GO:0001816 (cytokine production), GO:0002376 (immune system process), GO:0006508 (proteolysis), GO:0006915 (apoptotic process), GO:0006919 (activation of cysteine-type endopeptidas...), GO:0006950 (response to stress), GO:0006952 (defense response), GO:0006954 (inflammatory response), GO:0006955 (immune response), GO:0008150 (biological_process), GO:0008152 (metabolic process), GO:0008219 (cell d…
Fasl	NM_010177	1.11234	0.000602331	GO:0000122 (negative regulation of transcription fro...), GO:0001525 (angiogenesis), GO:0001568 (blood vessel development), GO:0001654 (eye development), GO:0001944 (vasculature development), GO:0002376 (immune system process), GO:0006139 (nucleobase-containing compound metabolic...), GO:0006351 (transcription, DNA-templated), GO:0006355 (regulation of transcription, DNA-templat...), GO:0006357 (…
Cd8b1	NM_009858	1.27487	0.000904531	GO:0002250 (adaptive immune response), GO:0002376 (immune system process), GO:0006955 (immune response), GO:0008150 (biological_process), GO:0050896 (response to stimulus)
Mefv	NM_019453	1.03294	0.000997394	GO:0001816 (cytokine production), GO:0001817 (regulation of cytokine production), GO:0001818 (negative regulation of cytokine producti...), GO:0002376 (immune system process), GO:0002532 (production of molecular mediator involve...), GO:0002534 (cytokine production involved in inflamma...), GO:0006461 (protein complex assembly), GO:0006508 (proteolysis), GO:0006914 (autophagy), GO:0006950 (respon…
Clec4b1	NM_027218	1.3003	0.00106064	GO:0006810 (transport), GO:0006811 (ion transport), GO:0006812 (cation transport), GO:0006816 (calcium ion transport), GO:0006873 (cellular ion homeostasis), GO:0006874 (cellular calcium ion homeostasis), GO:0006875 (cellular metal ion homeostasis), GO:0007204 (positive regulation of cytosolic calcium...), GO:0008150 (biological_process), GO:0009987 (cellular process), GO:0010522 (regulation of c…
Cxcr6	NM_030712	1.3108	0.00112639	GO:0006935 (chemotaxis), GO:0006950 (response to stress), GO:0006952 (defense response), GO:0006954 (inflammatory response), GO:0007154 (cell communication), GO:0007165 (signal transduction), GO:0007186 (G-protein coupled receptor signaling pat...), GO:0008150 (biological_process), GO:0009605 (response to external stimulus), GO:0009987 (cellular process), GO:0023052 (signaling), GO:0040011 (locom…
Klrk1	NM_033078	1.00983	0.0011614	GO:0001773 (myeloid dendritic cell activation), GO:0001775 (cell activation), GO:0001816 (cytokine production), GO:0001817 (regulation of cytokine production), GO:0001819 (positive regulation of cytokine producti...), GO:0001906 (cell killing), GO:0001909 (leukocyte mediated cytotoxicity), GO:0001910 (regulation of leukocyte mediated cytotox...), GO:0001912 (positive regulation of leukocyte media…
Tmem26	NM_177794	1.09235	0.00122371	GO:0008150 (biological_process)
Arhgap15	NM_153820	1.01698	0.00123413	GO:0000902 (cell morphogenesis), GO:0007154 (cell communication), GO:0007165 (signal transduction), GO:0008150 (biological_process), GO:0008360 (regulation of cell shape), GO:0009653 (anatomical structure morphogenesis), GO:0009987 (cellular process), GO:0016043 (cellular component organization), GO:0022603 (regulation of anatomical structure morph...), GO:0022604 (regulation of cell morphogenesi…
Hpgds	NM_019455	1.10075	0.00123608	GO:0000003 (reproduction), GO:0001516 (prostaglandin biosynthetic process), GO:0002176 (male germ cell proliferation), GO:0006082 (organic acid metabolic process), GO:0006629 (lipid metabolic process), GO:0006631 (fatty acid metabolic process), GO:0006633 (fatty acid biosynthetic process), GO:0006636 (unsaturated fatty acid biosynthetic proc...), GO:0006690 (icosanoid metabolic process), GO:00066…
Klra3	NM_010648	1.27643	0.00140708	NA
Cd8a	NM_001081110	1.28188	0.00154698	GO:0001775 (cell activation), GO:0002250 (adaptive immune response), GO:0002252 (immune effector process), GO:0002376 (immune system process), GO:0002443 (leukocyte mediated immunity), GO:0002449 (lymphocyte mediated immunity), GO:0002456 (T cell mediated immunity), GO:0002460 (adaptive immune response based on somati...), GO:0002520 (immune system development), GO:0002521 (leukocyte differentiat…
Sirpb1a	NM_001002898	1.11437	0.00157897	GO:0006810 (transport), GO:0006897 (endocytosis), GO:0006909 (phagocytosis), GO:0007154 (cell communication), GO:0007165 (signal transduction), GO:0008150 (biological_process), GO:0009987 (cellular process), GO:0016043 (cellular component organization), GO:0016192 (vesicle-mediated transport), GO:0023052 (signaling), GO:0030100 (regulation of endocytosis), GO:0032879 (regulation of localization),…
Clec4a4	NM_001005860	1.1377	0.00179109	GO:0008150 (biological_process)
Gpr18	NM_182806	1.09568	0.00183157	GO:0001775 (cell activation), GO:0001816 (cytokine production), GO:0001817 (regulation of cytokine production), GO:0001818 (negative regulation of cytokine producti...), GO:0002376 (immune system process), GO:0002520 (immune system development), GO:0002521 (leukocyte differentiation), GO:0002682 (regulation of immune system process), GO:0002683 (negative regulation of immune system pro...), GO:00…
Klrb1c	NM_008527	1.10995	0.00189189	GO:0001775 (cell activation), GO:0001906 (cell killing), GO:0001909 (leukocyte mediated cytotoxicity), GO:0001910 (regulation of leukocyte mediated cytotox...), GO:0001912 (positive regulation of leukocyte mediate...), GO:0002228 (natural killer cell mediated immunity), GO:0002252 (immune effector process), GO:0002376 (immune system process), GO:0002443 (leukocyte mediated immunity), GO:0002449 (…
C1qtnf3	NM_030888	1.0832	0.00198427	GO:0000165 (MAPK cascade), GO:0001816 (cytokine production), GO:0001817 (regulation of cytokine production), GO:0001818 (negative regulation of cytokine producti...), GO:0001819 (positive regulation of cytokine producti...), GO:0001932 (regulation of protein phosphorylation), GO:0001934 (positive regulation of protein phosphory...), GO:0002790 (peptide secretion), GO:0002791 (regulation of peptid…
Magea5	NM_020018	4.18516	0.00209687	GO:0008150 (biological_process)
Lilra5	NM_001081239	1.24158	0.00247848	GO:0008150 (biological_process)
Ubash3a	NM_177823	1.13511	0.00254263	GO:0001816 (cytokine production), GO:0001817 (regulation of cytokine production), GO:0002253 (activation of immune response), GO:0002376 (immune system process), GO:0002429 (immune response-activating cell surface ...), GO:0002682 (regulation of immune system process), GO:0002683 (negative regulation of immune system pro...), GO:0002684 (positive regulation of immune system pro...), GO:0002757 (i…
Fcgr4	NM_144559	1.05366	0.00278743	GO:0001775 (cell activation), GO:0001894 (tissue homeostasis), GO:0002237 (response to molecule of bacterial origin), GO:0002274 (myeloid leukocyte activation), GO:0002376 (immune system process), GO:0003008 (system process), GO:0007600 (sensory perception), GO:0008150 (biological_process), GO:0009605 (response to external stimulus), GO:0009607 (response to biotic stimulus), GO:0009617 (response …
Selenop	NM_009155	1.02786	0.00304434	GO:0000003 (reproduction), GO:0007275 (multicellular organism development), GO:0007399 (nervous system development), GO:0007417 (central nervous system development), GO:0007420 (brain development), GO:0007610 (behavior), GO:0007626 (locomotory behavior), GO:0008150 (biological_process), GO:0008152 (metabolic process), GO:0009791 (post-embryonic development), GO:0009987 (cellular process), GO:0019…
Treml4	NM_172623	1.1136	0.00333833	GO:0002250 (adaptive immune response), GO:0002252 (immune effector process), GO:0002376 (immune system process), GO:0002443 (leukocyte mediated immunity), GO:0002449 (lymphocyte mediated immunity), GO:0002456 (T cell mediated immunity), GO:0002457 (T cell antigen processing and presentati...), GO:0002460 (adaptive immune response based on somati...), GO:0006810 (transport), GO:0006897 (endocytosi…
Tagap	NM_145968	1.01805	0.00342707	GO:0002252 (immune effector process), GO:0002376 (immune system process), GO:0006950 (response to stress), GO:0006952 (defense response), GO:0007154 (cell communication), GO:0007165 (signal transduction), GO:0008150 (biological_process), GO:0009605 (response to external stimulus), GO:0009607 (response to biotic stimulus), GO:0009615 (response to virus), GO:0009987 (cellular process), GO:0016032 (…
Zfp810	NM_145612	1.02063	0.00355283	GO:0008150 (biological_process)
Aplnr	NM_011784	1.08599	0.0041304	GO:0007154 (cell communication), GO:0007165 (signal transduction), GO:0007186 (G-protein coupled receptor signaling pat...), GO:0007275 (multicellular organism development), GO:0007369 (gastrulation), GO:0008150 (biological_process), GO:0009653 (anatomical structure morphogenesis), GO:0009790 (embryo development), GO:0009987 (cellular process), GO:0023052 (signaling), GO:0032501 (multicellular or…
Fcrls	NM_030707	1.37232	0.00442	NA
Cxcr3	NM_009910	1.23551	0.00448406	GO:0001525 (angiogenesis), GO:0001568 (blood vessel development), GO:0001816 (cytokine production), GO:0001935 (endothelial cell proliferation), GO:0001936 (regulation of endothelial cell prolifera...), GO:0001937 (negative regulation of endothelial cell ...), GO:0001944 (vasculature development), GO:0002376 (immune system process), GO:0002682 (regulation of immune system process), GO:0002685 (re…
Cd27	NM_001033126	1.07542	0.00454899	GO:0000165 (MAPK cascade), GO:0001775 (cell activation), GO:0001816 (cytokine production), GO:0001817 (regulation of cytokine production), GO:0001819 (positive regulation of cytokine producti...), GO:0001932 (regulation of protein phosphorylation), GO:0001934 (positive regulation of protein phosphory...), GO:0002237 (response to molecule of bacterial origin), GO:0002376 (immune system process), G…

## Sheet: day3_Top100.DOWN.DEGs
Table S1e. Genes significantly differentially downregulated between Vehicle and RXDX-106 treated MC83 mice at day 3. Statistical significance was defined as |log2FC|>1, FDR<0.01 and FPKM>1 in 2 or more samples within the contrasting groups. 5/32 (15.6%) genes significantly downregulated at day 3 annotate to an immunological GO term as indicated in the yellow cells.
SYMBOL	REFSEQ	logFC	FDR	GO.ID
Hmga1	NM_016660	-1.00047	9.33439e-23	GO:0000003 (reproduction), GO:0006139 (nucleobase-containing compound metabolic...), GO:0006259 (DNA metabolic process), GO:0006281 (DNA repair), GO:0006284 (base-excision repair), GO:0006351 (transcription, DNA-templated), GO:0006355 (regulation of transcription, DNA-templat...), GO:0006357 (regulation of transcription from RNA pol...), GO:0006366 (transcription from RNA polymerase II pro...), G…
Stc2	NM_011491	-1.16994	8.67259e-20	GO:0002115 (store-operated calcium entry), GO:0006810 (transport), GO:0006811 (ion transport), GO:0006812 (cation transport), GO:0006816 (calcium ion transport), GO:0006817 (phosphate ion transport), GO:0006820 (anion transport), GO:0006873 (cellular ion homeostasis), GO:0006874 (cellular calcium ion homeostasis), GO:0006875 (cellular metal ion homeostasis), GO:0006950 (response to stress), GO:00…
Slco4a1	NM_148933	-1.24162	2.37367e-19	GO:0006575 (cellular modified amino acid metabolic p...), GO:0006725 (cellular aromatic compound metabolic pro...), GO:0006807 (nitrogen compound metabolic process), GO:0006810 (transport), GO:0006811 (ion transport), GO:0006820 (anion transport), GO:0008150 (biological_process), GO:0008152 (metabolic process), GO:0009987 (cellular process), GO:0010817 (regulation of hormone levels), GO:0015711 (…
Foxc2	NM_013519	-1.16745	3.41176e-17	GO:0000122 (negative regulation of transcription fro...), GO:0001501 (skeletal system development), GO:0001503 (ossification), GO:0001525 (angiogenesis), GO:0001568 (blood vessel development), GO:0001569 (branching involved in blood vessel morph...), GO:0001654 (eye development), GO:0001655 (urogenital system development), GO:0001656 (metanephros development), GO:0001657 (ureteric bud development…
Tfrc	NM_011638	-1.15377	1.64728e-16	GO:0000018 (regulation of DNA recombination), GO:0000041 (transition metal ion transport), GO:0001775 (cell activation), GO:0001894 (tissue homeostasis), GO:0002200 (somatic diversification of immune recept...), GO:0002204 (somatic recombination of immunoglobulin ...), GO:0002208 (somatic diversification of immunoglobuli...), GO:0002250 (adaptive immune response), GO:0002252 (immune effector proc…
Slc7a11	NM_011990	-1.39574	1.70399e-14	GO:0001775 (cell activation), GO:0003333 (amino acid transmembrane transport), GO:0006810 (transport), GO:0006811 (ion transport), GO:0006820 (anion transport), GO:0006835 (dicarboxylic acid transport), GO:0006865 (amino acid transport), GO:0006950 (response to stress), GO:0007155 (cell adhesion), GO:0007596 (blood coagulation), GO:0007599 (hemostasis), GO:0008150 (biological_process), GO:0009611…
Dynap	NM_029346	-2.2847	1.70399e-14	NA
Chac1	NM_026929	-1.15093	4.85207e-14	GO:0006508 (proteolysis), GO:0006518 (peptide metabolic process), GO:0006575 (cellular modified amino acid metabolic p...), GO:0006749 (glutathione metabolic process), GO:0006751 (glutathione catabolic process), GO:0006790 (sulfur compound metabolic process), GO:0006807 (nitrogen compound metabolic process), GO:0006915 (apoptotic process), GO:0006950 (response to stress), GO:0006986 (response to …
Ciart	NM_001033302	-1.46081	6.89064e-14	GO:0006139 (nucleobase-containing compound metabolic...), GO:0006351 (transcription, DNA-templated), GO:0006355 (regulation of transcription, DNA-templat...), GO:0006725 (cellular aromatic compound metabolic pro...), GO:0006807 (nitrogen compound metabolic process), GO:0007610 (behavior), GO:0007622 (rhythmic behavior), GO:0007623 (circadian rhythm), GO:0007626 (locomotory behavior), GO:0008150 (…
Mfsd2a	NM_029662	-1.02691	5.3946e-13	GO:0006810 (transport), GO:0006811 (ion transport), GO:0006820 (anion transport), GO:0006869 (lipid transport), GO:0007275 (multicellular organism development), GO:0007399 (nervous system development), GO:0007417 (central nervous system development), GO:0007420 (brain development), GO:0008150 (biological_process), GO:0009987 (cellular process), GO:0010876 (lipid localization), GO:0015711 (organic…
Gdf15	NM_011819	-1.86305	1.2747e-12	GO:0000165 (MAPK cascade), GO:0000768 (syncytium formation by plasma membrane f...), GO:0001932 (regulation of protein phosphorylation), GO:0001934 (positive regulation of protein phosphory...), GO:0006139 (nucleobase-containing compound metabolic...), GO:0006351 (transcription, DNA-templated), GO:0006355 (regulation of transcription, DNA-templat...), GO:0006357 (regulation of transcription from …
Aldh1l2	NM_153543	-1.04033	2.35758e-12	GO:0006082 (organic acid metabolic process), GO:0006575 (cellular modified amino acid metabolic p...), GO:0006725 (cellular aromatic compound metabolic pro...), GO:0006730 (one-carbon metabolic process), GO:0006732 (coenzyme metabolic process), GO:0006760 (folic acid-containing compound metabolic...), GO:0006807 (nitrogen compound metabolic process), GO:0008150 (biological_process), GO:0008152 (m…
Adm2	NM_182928	-1.6389	3.98963e-12	GO:0001525 (angiogenesis), GO:0001568 (blood vessel development), GO:0001944 (vasculature development), GO:0003008 (system process), GO:0003013 (circulatory system process), GO:0006464 (cellular protein modification process), GO:0006468 (protein phosphorylation), GO:0006793 (phosphorus metabolic process), GO:0006796 (phosphate-containing compound metabolic ...), GO:0007154 (cell communication), G…
Tnnt2	NM_011619	-1.44325	6.44888e-11	GO:0003007 (heart morphogenesis), GO:0003008 (system process), GO:0003012 (muscle system process), GO:0003013 (circulatory system process), GO:0003015 (heart process), GO:0003205 (cardiac chamber development), GO:0003206 (cardiac chamber morphogenesis), GO:0003208 (cardiac ventricle morphogenesis), GO:0003209 (cardiac atrium morphogenesis), GO:0003228 (atrial cardiac muscle tissue development), G…
Dusp4	NM_176933	-1.16326	1.32686e-10	GO:0000165 (MAPK cascade), GO:0000188 (inactivation of MAPK activity), GO:0001704 (formation of primary germ layer), GO:0001706 (endoderm formation), GO:0001932 (regulation of protein phosphorylation), GO:0001933 (negative regulation of protein phosphory...), GO:0006464 (cellular protein modification process), GO:0006468 (protein phosphorylation), GO:0006469 (negative regulation of protein kinase…
Trib3	NM_175093	-1.24905	4.64135e-10	GO:0000122 (negative regulation of transcription fro...), GO:0000165 (MAPK cascade), GO:0001932 (regulation of protein phosphorylation), GO:0001933 (negative regulation of protein phosphory...), GO:0006082 (organic acid metabolic process), GO:0006139 (nucleobase-containing compound metabolic...), GO:0006351 (transcription, DNA-templated), GO:0006355 (regulation of transcription, DNA-templat...), …
Cldn9	NM_020293	-1.22326	7.62929e-10	GO:0008150 (biological_process), GO:0009987 (cellular process), GO:0016043 (cellular component organization), GO:0034330 (cell junction organization), GO:0044699 (single-organism process), GO:0044763 (single-organism cellular process), GO:0045216 (cell-cell junction organization), GO:0071840 (cellular component organization or bioge...)
Fam110c	NM_027828	-1.13983	3.14002e-09	GO:0006928 (movement of cell or subcellular componen...), GO:0007154 (cell communication), GO:0007165 (signal transduction), GO:0008150 (biological_process), GO:0009966 (regulation of signal transduction), GO:0009967 (positive regulation of signal transducti...), GO:0009987 (cellular process), GO:0010646 (regulation of cell communication), GO:0010647 (positive regulation of cell communicatio...),…
Pls1	NM_001033210	-1.10222	5.1948e-09	GO:0003008 (system process), GO:0006810 (transport), GO:0006996 (organelle organization), GO:0007009 (plasma membrane organization), GO:0007010 (cytoskeleton organization), GO:0007015 (actin filament organization), GO:0007586 (digestion), GO:0008104 (protein localization), GO:0008150 (biological_process), GO:0008643 (carbohydrate transport), GO:0008645 (hexose transport), GO:0009987 (cellular pro…
S100a3	NM_011310	-1.14642	4.93807e-07	NA
Areg	NM_009704	-1.9645	1.80987e-05	GO:0000003 (reproduction), GO:0001503 (ossification), GO:0001649 (osteoblast differentiation), GO:0001763 (morphogenesis of a branching structure), GO:0001932 (regulation of protein phosphorylation), GO:0001934 (positive regulation of protein phosphory...), GO:0002009 (morphogenesis of an epithelium), GO:0003006 (developmental process involved in reprod...), GO:0003401 (axis elongation), GO:00061…
Angptl6	NM_145154	-1.10899	5.5824e-05	GO:0001525 (angiogenesis), GO:0001568 (blood vessel development), GO:0001944 (vasculature development), GO:0007275 (multicellular organism development), GO:0008150 (biological_process), GO:0009653 (anatomical structure morphogenesis), GO:0009987 (cellular process), GO:0030154 (cell differentiation), GO:0032501 (multicellular organismal process), GO:0032502 (developmental process), GO:0044699 (sin…
Prl2c2	NM_031191	-1.01916	0.00013185	GO:0001525 (angiogenesis), GO:0001568 (blood vessel development), GO:0001667 (ameboidal-type cell migration), GO:0001944 (vasculature development), GO:0002040 (sprouting angiogenesis), GO:0002052 (positive regulation of neuroblast prolif...), GO:0006139 (nucleobase-containing compound metabolic...), GO:0006351 (transcription, DNA-templated), GO:0006355 (regulation of transcription, DNA-templat...…
Ptgs2	NM_011198	-1.04792	0.000195599	GO:0000003 (reproduction), GO:0001503 (ossification), GO:0001516 (prostaglandin biosynthetic process), GO:0001525 (angiogenesis), GO:0001568 (blood vessel development), GO:0001659 (temperature homeostasis), GO:0001660 (fever generation), GO:0001667 (ameboidal-type cell migration), GO:0001676 (long-chain fatty acid metabolic process), GO:0001816 (cytokine production), GO:0001817 (regulation of cyt…
Prl2c3	NM_011118	-1.97487	0.000197312	GO:0008150 (biological_process), GO:0008283 (cell proliferation), GO:0008284 (positive regulation of cell proliferatio...), GO:0009987 (cellular process), GO:0042127 (regulation of cell proliferation), GO:0044699 (single-organism process), GO:0048518 (positive regulation of biological proces...), GO:0048522 (positive regulation of cellular process), GO:0050789 (regulation of biological process), …
Prl2c4	NM_011954	-1.9729	0.000204737	NA
Kcne3	NM_020574	-1.13278	0.000335046	GO:0001508 (action potential), GO:0002027 (regulation of heart rate), GO:0003008 (system process), GO:0003012 (muscle system process), GO:0003013 (circulatory system process), GO:0003015 (heart process), GO:0006810 (transport), GO:0006811 (ion transport), GO:0006812 (cation transport), GO:0006813 (potassium ion transport), GO:0006816 (calcium ion transport), GO:0006928 (movement of cell or subcel…
Car6	NM_009802	-1.32678	0.000591667	GO:0001580 (detection of chemical stimulus involved ...), GO:0003008 (system process), GO:0006730 (one-carbon metabolic process), GO:0007600 (sensory perception), GO:0007606 (sensory perception of chemical stimulus), GO:0008150 (biological_process), GO:0008152 (metabolic process), GO:0009593 (detection of chemical stimulus), GO:0009987 (cellular process), GO:0032501 (multicellular organismal proc…
Glod5	NM_027227	-1.06223	0.00346587	GO:0008150 (biological_process)
Hist1h4m	NM_001195421	-1.47393	0.00468187	GO:0002376 (immune system process), GO:0002520 (immune system development), GO:0002682 (regulation of immune system process), GO:0002683 (negative regulation of immune system pro...), GO:0006323 (DNA packaging), GO:0006325 (chromatin organization), GO:0006333 (chromatin assembly or disassembly), GO:0006334 (nucleosome assembly), GO:0006335 (DNA replication-dependent nucleosome ass...), GO:0006336…
Hist1h4n	NM_175657	-1.47393	0.00468187	GO:0002376 (immune system process), GO:0002520 (immune system development), GO:0002682 (regulation of immune system process), GO:0002683 (negative regulation of immune system pro...), GO:0006323 (DNA packaging), GO:0006325 (chromatin organization), GO:0006333 (chromatin assembly or disassembly), GO:0006334 (nucleosome assembly), GO:0006335 (DNA replication-dependent nucleosome ass...), GO:0006336…
Nppb	NM_008726	-1.35899	0.00652382	GO:0001558 (regulation of cell growth), GO:0003008 (system process), GO:0003012 (muscle system process), GO:0003013 (circulatory system process), GO:0003014 (renal system process), GO:0003018 (vascular process in circulatory system), GO:0003073 (regulation of systemic arterial blood pr...), GO:0003085 (negative regulation of systemic arterial...), GO:0003299 (muscle hypertrophy in response to str…

## Sheet: day5_Top100.DOWN.DEGs
Table S1f. Genes significantly differentially downregulated between Vehicle and RXDX-106 treated MC83 mice at day 5. Statistical significance was defined as |log2FC|>1, FDR<0.01 and FPKM>1 in 2 or more samples within the contrasting groups. 18/63 (28.6%) genes significantly downregulated at day 5 annotate to an immunological GO term as indicated in the yellow cells.
SYMBOL	REFSEQ	logFC	FDR	GO.ID
Dynap	NM_029346	-2.82091	3.82842e-20	NA
Foxc2	NM_013519	-1.15985	1.54682e-16	GO:0000122 (negative regulation of transcription fro...), GO:0001501 (skeletal system development), GO:0001503 (ossification), GO:0001525 (angiogenesis), GO:0001568 (blood vessel development), GO:0001569 (branching involved in blood vessel morph...), GO:0001654 (eye development), GO:0001655 (urogenital system development), GO:0001656 (metanephros development), GO:0001657 (ureteric bud development…
Tnnt2	NM_011619	-1.8474	1.71059e-16	GO:0003007 (heart morphogenesis), GO:0003008 (system process), GO:0003012 (muscle system process), GO:0003013 (circulatory system process), GO:0003015 (heart process), GO:0003205 (cardiac chamber development), GO:0003206 (cardiac chamber morphogenesis), GO:0003208 (cardiac ventricle morphogenesis), GO:0003209 (cardiac atrium morphogenesis), GO:0003228 (atrial cardiac muscle tissue development), G…
Slco4a1	NM_148933	-1.09067	1.04259e-14	GO:0006575 (cellular modified amino acid metabolic p...), GO:0006725 (cellular aromatic compound metabolic pro...), GO:0006807 (nitrogen compound metabolic process), GO:0006810 (transport), GO:0006811 (ion transport), GO:0006820 (anion transport), GO:0008150 (biological_process), GO:0008152 (metabolic process), GO:0009987 (cellular process), GO:0010817 (regulation of hormone levels), GO:0015711 (…
Aldh1l2	NM_153543	-1.16385	1.04259e-14	GO:0006082 (organic acid metabolic process), GO:0006575 (cellular modified amino acid metabolic p...), GO:0006725 (cellular aromatic compound metabolic pro...), GO:0006730 (one-carbon metabolic process), GO:0006732 (coenzyme metabolic process), GO:0006760 (folic acid-containing compound metabolic...), GO:0006807 (nitrogen compound metabolic process), GO:0008150 (biological_process), GO:0008152 (m…
Slc7a11	NM_011990	-1.41326	2.12912e-14	GO:0001775 (cell activation), GO:0003333 (amino acid transmembrane transport), GO:0006810 (transport), GO:0006811 (ion transport), GO:0006820 (anion transport), GO:0006835 (dicarboxylic acid transport), GO:0006865 (amino acid transport), GO:0006950 (response to stress), GO:0007155 (cell adhesion), GO:0007596 (blood coagulation), GO:0007599 (hemostasis), GO:0008150 (biological_process), GO:0009611…
Tcam1	NM_029467	-1.7787	1.11035e-13	GO:0007155 (cell adhesion), GO:0008150 (biological_process), GO:0016337 (single organismal cell-cell adhesion), GO:0022610 (biological adhesion), GO:0044699 (single-organism process), GO:0098602 (single organism cell adhesion), GO:0098609 (cell-cell adhesion)
Dusp4	NM_176933	-1.35922	1.15995e-13	GO:0000165 (MAPK cascade), GO:0000188 (inactivation of MAPK activity), GO:0001704 (formation of primary germ layer), GO:0001706 (endoderm formation), GO:0001932 (regulation of protein phosphorylation), GO:0001933 (negative regulation of protein phosphory...), GO:0006464 (cellular protein modification process), GO:0006468 (protein phosphorylation), GO:0006469 (negative regulation of protein kinase…
AA467197	NM_001004174	-1.34745	1.86735e-13	GO:0008150 (biological_process)
Ciart	NM_001033302	-1.44064	2.70616e-13	GO:0006139 (nucleobase-containing compound metabolic...), GO:0006351 (transcription, DNA-templated), GO:0006355 (regulation of transcription, DNA-templat...), GO:0006725 (cellular aromatic compound metabolic pro...), GO:0006807 (nitrogen compound metabolic process), GO:0007610 (behavior), GO:0007622 (rhythmic behavior), GO:0007623 (circadian rhythm), GO:0007626 (locomotory behavior), GO:0008150 (…
Trib3	NM_175093	-1.482	2.79181e-13	GO:0000122 (negative regulation of transcription fro...), GO:0000165 (MAPK cascade), GO:0001932 (regulation of protein phosphorylation), GO:0001933 (negative regulation of protein phosphory...), GO:0006082 (organic acid metabolic process), GO:0006139 (nucleobase-containing compound metabolic...), GO:0006351 (transcription, DNA-templated), GO:0006355 (regulation of transcription, DNA-templat...), …
Ankrd37	NM_001039562	-1.52341	4.99381e-13	GO:0008150 (biological_process)
1810011O10Rik	NM_026931	-1.30898	1.29076e-12	GO:0001775 (cell activation), GO:0001932 (regulation of protein phosphorylation), GO:0001934 (positive regulation of protein phosphory...), GO:0002252 (immune effector process), GO:0002263 (cell activation involved in immune respo...), GO:0002376 (immune system process), GO:0002520 (immune system development), GO:0002682 (regulation of immune system process), GO:0006139 (nucleobase-containing com…
Adm2	NM_182928	-1.68999	1.31895e-12	GO:0001525 (angiogenesis), GO:0001568 (blood vessel development), GO:0001944 (vasculature development), GO:0003008 (system process), GO:0003013 (circulatory system process), GO:0006464 (cellular protein modification process), GO:0006468 (protein phosphorylation), GO:0006793 (phosphorus metabolic process), GO:0006796 (phosphate-containing compound metabolic ...), GO:0007154 (cell communication), G…
Vegfa	NM_009505	-1.34688	2.14534e-12	GO:0000003 (reproduction), GO:0000122 (negative regulation of transcription fro...), GO:0000165 (MAPK cascade), GO:0000902 (cell morphogenesis), GO:0000904 (cell morphogenesis involved in different...), GO:0001501 (skeletal system development), GO:0001503 (ossification), GO:0001525 (angiogenesis), GO:0001541 (ovarian follicle development), GO:0001558 (regulation of cell growth), GO:0001568 (blood…
Slc16a3	NM_030696	-1.18732	2.82592e-12	GO:0006810 (transport), GO:0006811 (ion transport), GO:0006820 (anion transport), GO:0008150 (biological_process), GO:0015711 (organic anion transport), GO:0015718 (monocarboxylic acid transport), GO:0015727 (lactate transport), GO:0015849 (organic acid transport), GO:0015850 (organic hydroxy compound transport), GO:0034220 (ion transmembrane transport), GO:0035873 (lactate transmembrane transpor…
Gdf15	NM_011819	-1.82	3.46587e-12	GO:0000165 (MAPK cascade), GO:0000768 (syncytium formation by plasma membrane f...), GO:0001932 (regulation of protein phosphorylation), GO:0001934 (positive regulation of protein phosphory...), GO:0006139 (nucleobase-containing compound metabolic...), GO:0006351 (transcription, DNA-templated), GO:0006355 (regulation of transcription, DNA-templat...), GO:0006357 (regulation of transcription from …
Vldlr	NM_013703	-1.40885	7.71048e-12	GO:0000122 (negative regulation of transcription fro...), GO:0000902 (cell morphogenesis), GO:0000904 (cell morphogenesis involved in different...), GO:0001666 (response to hypoxia), GO:0001932 (regulation of protein phosphorylation), GO:0001934 (positive regulation of protein phosphory...), GO:0006066 (alcohol metabolic process), GO:0006139 (nucleobase-containing compound metabolic...), GO:00063…
Foxl1	NM_008024	-1.09637	1.09384e-11	GO:0002376 (immune system process), GO:0002520 (immune system development), GO:0006029 (proteoglycan metabolic process), GO:0006139 (nucleobase-containing compound metabolic...), GO:0006351 (transcription, DNA-templated), GO:0006355 (regulation of transcription, DNA-templat...), GO:0006725 (cellular aromatic compound metabolic pro...), GO:0006807 (nitrogen compound metabolic process), GO:0007154 …
Ak4	NM_009647	-1.22012	1.73736e-11	GO:0006139 (nucleobase-containing compound metabolic...), GO:0006163 (purine nucleotide metabolic process), GO:0006165 (nucleoside diphosphate phosphorylation), GO:0006725 (cellular aromatic compound metabolic pro...), GO:0006753 (nucleoside phosphate metabolic process), GO:0006793 (phosphorus metabolic process), GO:0006796 (phosphate-containing compound metabolic ...), GO:0006807 (nitrogen compo…
Pls1	NM_001033210	-1.23094	3.0804e-11	GO:0003008 (system process), GO:0006810 (transport), GO:0006996 (organelle organization), GO:0007009 (plasma membrane organization), GO:0007010 (cytoskeleton organization), GO:0007015 (actin filament organization), GO:0007586 (digestion), GO:0008104 (protein localization), GO:0008150 (biological_process), GO:0008643 (carbohydrate transport), GO:0008645 (hexose transport), GO:0009987 (cellular pro…
Ero1l	NM_015774	-1.59641	4.79477e-11	GO:0006082 (organic acid metabolic process), GO:0006457 (protein folding), GO:0006458 ('de novo' protein folding), GO:0006464 (cellular protein modification process), GO:0006520 (cellular amino acid metabolic process), GO:0006575 (cellular modified amino acid metabolic p...), GO:0006807 (nitrogen compound metabolic process), GO:0006810 (transport), GO:0006811 (ion transport), GO:0006812 (cation t…
Bnip3	NM_009760	-1.55148	4.84261e-11	GO:0000266 (mitochondrial fission), GO:0000302 (response to reactive oxygen species), GO:0000422 (mitophagy), GO:0001666 (response to hypoxia), GO:0001836 (release of cytochrome c from mitochondri...), GO:0002252 (immune effector process), GO:0002376 (immune system process), GO:0006091 (generation of precursor metabolites and ...), GO:0006810 (transport), GO:0006839 (mitochondrial transport), GO:…
Ier3	NM_133662	-1.50207	9.17413e-11	GO:0000075 (cell cycle checkpoint), GO:0000077 (DNA damage checkpoint), GO:0000086 (G2/M transition of mitotic cell cycle), GO:0000278 (mitotic cell cycle), GO:0001562 (response to protozoan), GO:0003008 (system process), GO:0003013 (circulatory system process), GO:0003073 (regulation of systemic arterial blood pr...), GO:0003085 (negative regulation of systemic arterial...), GO:0005975 (carbohyd…
Slc2a1	NM_011400	-1.1558	6.44237e-10	GO:0006461 (protein complex assembly), GO:0006810 (transport), GO:0006811 (ion transport), GO:0006820 (anion transport), GO:0006950 (response to stress), GO:0007154 (cell communication), GO:0008150 (biological_process), GO:0008643 (carbohydrate transport), GO:0008645 (hexose transport), GO:0009267 (cellular response to starvation), GO:0009605 (response to external stimulus), GO:0009987 (cellular …
1700012B09Rik	NM_029306	-3.22256	1.92245e-09	GO:0008150 (biological_process)
Ndrg1	NM_008681	-1.22845	2.24929e-09	GO:0000075 (cell cycle checkpoint), GO:0001775 (cell activation), GO:0002274 (myeloid leukocyte activation), GO:0002376 (immune system process), GO:0007009 (plasma membrane organization), GO:0007049 (cell cycle), GO:0007272 (ensheathment of neurons), GO:0007275 (multicellular organism development), GO:0007399 (nervous system development), GO:0007422 (peripheral nervous system development), GO:000…
Rab17	NM_008998	-1.47355	1.11094e-08	GO:0002251 (organ or tissue specific immune response), GO:0002376 (immune system process), GO:0002385 (mucosal immune response), GO:0006810 (transport), GO:0006955 (immune response), GO:0006996 (organelle organization), GO:0007275 (multicellular organism development), GO:0007399 (nervous system development), GO:0007416 (synapse assembly), GO:0008104 (protein localization), GO:0008150 (biological_…
Ido2	NM_145949	-1.03973	1.56915e-08	GO:0002376 (immune system process), GO:0006082 (organic acid metabolic process), GO:0006520 (cellular amino acid metabolic process), GO:0006568 (tryptophan metabolic process), GO:0006569 (tryptophan catabolic process), GO:0006576 (cellular biogenic amine metabolic proces...), GO:0006586 (indolalkylamine metabolic process), GO:0006725 (cellular aromatic compound metabolic pro...), GO:0006807 (nitr…
Glod5	NM_027227	-2.03757	1.65247e-08	GO:0008150 (biological_process)
Hilpda	NM_023516	-1.01249	2.35718e-08	GO:0001816 (cytokine production), GO:0001817 (regulation of cytokine production), GO:0001819 (positive regulation of cytokine producti...), GO:0007154 (cell communication), GO:0007267 (cell-cell signaling), GO:0008150 (biological_process), GO:0008283 (cell proliferation), GO:0008284 (positive regulation of cell proliferatio...), GO:0009987 (cellular process), GO:0010876 (lipid localization), GO:0…
Cxcl11	NM_019494	-1.22885	2.41523e-08	NA
Unc13a	NM_001029873	-1.20698	6.78113e-08	GO:0000902 (cell morphogenesis), GO:0001505 (regulation of neurotransmitter levels), GO:0001558 (regulation of cell growth), GO:0001956 (positive regulation of neurotransmitter ...), GO:0006461 (protein complex assembly), GO:0006518 (peptide metabolic process), GO:0006807 (nitrogen compound metabolic process), GO:0006810 (transport), GO:0006836 (neurotransmitter transport), GO:0006887 (exocytosis…
Ptgs2	NM_011198	-1.48822	1.36241e-07	GO:0000003 (reproduction), GO:0001503 (ossification), GO:0001516 (prostaglandin biosynthetic process), GO:0001525 (angiogenesis), GO:0001568 (blood vessel development), GO:0001659 (temperature homeostasis), GO:0001660 (fever generation), GO:0001667 (ameboidal-type cell migration), GO:0001676 (long-chain fatty acid metabolic process), GO:0001816 (cytokine production), GO:0001817 (regulation of cyt…
Has2	NM_008216	-1.13999	1.59658e-07	GO:0000271 (polysaccharide biosynthetic process), GO:0000902 (cell morphogenesis), GO:0000904 (cell morphogenesis involved in different...), GO:0001501 (skeletal system development), GO:0001568 (blood vessel development), GO:0001570 (vasculogenesis), GO:0001667 (ameboidal-type cell migration), GO:0001837 (epithelial to mesenchymal transition), GO:0001944 (vasculature development), GO:0003007 (hea…
Atp13a4	NM_001164613	-1.23117	1.6565e-07	GO:0006810 (transport), GO:0006811 (ion transport), GO:0006812 (cation transport), GO:0006873 (cellular ion homeostasis), GO:0006874 (cellular calcium ion homeostasis), GO:0006875 (cellular metal ion homeostasis), GO:0008150 (biological_process), GO:0009987 (cellular process), GO:0019725 (cellular homeostasis), GO:0030003 (cellular cation homeostasis), GO:0042592 (homeostatic process), GO:0044699…
Cfap45	NM_027972	-1.17918	3.73521e-07	GO:0008150 (biological_process)
Car9	NM_139305	-1.84768	3.77291e-07	GO:0002009 (morphogenesis of an epithelium), GO:0006730 (one-carbon metabolic process), GO:0006810 (transport), GO:0008150 (biological_process), GO:0008152 (metabolic process), GO:0009653 (anatomical structure morphogenesis), GO:0009888 (tissue development), GO:0009987 (cellular process), GO:0032502 (developmental process), GO:0044237 (cellular metabolic process), GO:0044281 (small molecule metab…
Soat2	NM_146064	-1.27248	9.91808e-07	GO:0006066 (alcohol metabolic process), GO:0006629 (lipid metabolic process), GO:0006810 (transport), GO:0006869 (lipid transport), GO:0008150 (biological_process), GO:0008152 (metabolic process), GO:0008202 (steroid metabolic process), GO:0008203 (cholesterol metabolic process), GO:0009987 (cellular process), GO:0010876 (lipid localization), GO:0015850 (organic hydroxy compound transport), GO:00…
Il6	NM_031168	-1.64524	9.94717e-07	GO:0000060 (protein import into nucleus, translocati...), GO:0000165 (MAPK cascade), GO:0000302 (response to reactive oxygen species), GO:0000902 (cell morphogenesis), GO:0001562 (response to protozoan), GO:0001763 (morphogenesis of a branching structure), GO:0001775 (cell activation), GO:0001776 (leukocyte homeostasis), GO:0001780 (neutrophil homeostasis), GO:0001781 (neutrophil apoptotic proces…
Vsig8	NM_177723	-1.72569	1.18716e-06	GO:0008150 (biological_process)
Calr4	NM_001033226	-1.05792	1.24135e-06	GO:0008150 (biological_process)
Angptl6	NM_145154	-1.33965	1.66777e-06	GO:0001525 (angiogenesis), GO:0001568 (blood vessel development), GO:0001944 (vasculature development), GO:0007275 (multicellular organism development), GO:0008150 (biological_process), GO:0009653 (anatomical structure morphogenesis), GO:0009987 (cellular process), GO:0030154 (cell differentiation), GO:0032501 (multicellular organismal process), GO:0032502 (developmental process), GO:0044699 (sin…
Ch25h	NM_009890	-1.06321	1.94563e-06	GO:0002376 (immune system process), GO:0006066 (alcohol metabolic process), GO:0006629 (lipid metabolic process), GO:0006694 (steroid biosynthetic process), GO:0006928 (movement of cell or subcellular componen...), GO:0006935 (chemotaxis), GO:0008150 (biological_process), GO:0008152 (metabolic process), GO:0008202 (steroid metabolic process), GO:0008203 (cholesterol metabolic process), GO:0008610…
S100a3	NM_011310	-1.05331	3.02351e-06	NA
Slpi	NM_011414	-1.50119	4.88562e-06	GO:0002237 (response to molecule of bacterial origin), GO:0002376 (immune system process), GO:0006508 (proteolysis), GO:0006950 (response to stress), GO:0006952 (defense response), GO:0006955 (immune response), GO:0006959 (humoral immune response), GO:0008150 (biological_process), GO:0008152 (metabolic process), GO:0009605 (response to external stimulus), GO:0009607 (response to biotic stimulus),…
Aire	NM_009646	-1.90225	6.22212e-06	GO:0001775 (cell activation), GO:0001816 (cytokine production), GO:0002009 (morphogenesis of an epithelium), GO:0002250 (adaptive immune response), GO:0002252 (immune effector process), GO:0002376 (immune system process), GO:0002443 (leukocyte mediated immunity), GO:0002449 (lymphocyte mediated immunity), GO:0002456 (T cell mediated immunity), GO:0002460 (adaptive immune response based on somati.…
Slco1a5	NM_130861	-1.06716	1.75948e-05	GO:0003008 (system process), GO:0006810 (transport), GO:0006811 (ion transport), GO:0006820 (anion transport), GO:0006869 (lipid transport), GO:0007586 (digestion), GO:0008150 (biological_process), GO:0010876 (lipid localization), GO:0015711 (organic anion transport), GO:0015718 (monocarboxylic acid transport), GO:0015721 (bile acid and bile salt transport), GO:0015849 (organic acid transport), G…
Hmox1	NM_010442	-1.13936	2.20781e-05	GO:0000302 (response to reactive oxygen species), GO:0001525 (angiogenesis), GO:0001568 (blood vessel development), GO:0001666 (response to hypoxia), GO:0001775 (cell activation), GO:0001816 (cytokine production), GO:0001817 (regulation of cytokine production), GO:0001818 (negative regulation of cytokine producti...), GO:0001889 (liver development), GO:0001944 (vasculature development), GO:000224…
Mmp12	NM_008605	-1.74403	4.44979e-05	GO:0002009 (morphogenesis of an epithelium), GO:0002011 (morphogenesis of an epithelial sheet), GO:0006139 (nucleobase-containing compound metabolic...), GO:0006351 (transcription, DNA-templated), GO:0006355 (regulation of transcription, DNA-templat...), GO:0006357 (regulation of transcription from RNA pol...), GO:0006366 (transcription from RNA polymerase II pro...), GO:0006508 (proteolysis), GO…
Arg1	NM_007482	-1.44113	9.20384e-05	GO:0000050 (urea cycle), GO:0001935 (endothelial cell proliferation), GO:0001936 (regulation of endothelial cell prolifera...), GO:0001938 (positive regulation of endothelial cell ...), GO:0006082 (organic acid metabolic process), GO:0006461 (protein complex assembly), GO:0006520 (cellular amino acid metabolic process), GO:0006525 (arginine metabolic process), GO:0006527 (arginine catabolic proce…
Ido1	NM_008324	-1.33337	9.45659e-05	GO:0001775 (cell activation), GO:0001816 (cytokine production), GO:0001817 (regulation of cytokine production), GO:0001818 (negative regulation of cytokine producti...), GO:0001819 (positive regulation of cytokine producti...), GO:0002237 (response to molecule of bacterial origin), GO:0002376 (immune system process), GO:0002507 (tolerance induction), GO:0002517 (T cell tolerance induction), GO:00…
Cyr61	NM_010516	-1.06612	0.000114316	GO:0000003 (reproduction), GO:0000165 (MAPK cascade), GO:0001501 (skeletal system development), GO:0001503 (ossification), GO:0001525 (angiogenesis), GO:0001558 (regulation of cell growth), GO:0001568 (blood vessel development), GO:0001649 (osteoblast differentiation), GO:0001701 (in utero embryonic development), GO:0001890 (placenta development), GO:0001892 (embryonic placenta development), GO:0…
Cxcl2	NM_009140	-2.53714	0.000125554	GO:0002237 (response to molecule of bacterial origin), GO:0002376 (immune system process), GO:0002682 (regulation of immune system process), GO:0002684 (positive regulation of immune system pro...), GO:0002685 (regulation of leukocyte migration), GO:0002687 (positive regulation of leukocyte migrati...), GO:0002688 (regulation of leukocyte chemotaxis), GO:0002690 (positive regulation of leukocyte …
Car6	NM_009802	-1.32418	0.000774818	GO:0001580 (detection of chemical stimulus involved ...), GO:0003008 (system process), GO:0006730 (one-carbon metabolic process), GO:0007600 (sensory perception), GO:0007606 (sensory perception of chemical stimulus), GO:0008150 (biological_process), GO:0008152 (metabolic process), GO:0009593 (detection of chemical stimulus), GO:0009987 (cellular process), GO:0032501 (multicellular organismal proc…
Prl2c3	NM_011118	-1.78559	0.000948777	GO:0008150 (biological_process), GO:0008283 (cell proliferation), GO:0008284 (positive regulation of cell proliferatio...), GO:0009987 (cellular process), GO:0042127 (regulation of cell proliferation), GO:0044699 (single-organism process), GO:0048518 (positive regulation of biological proces...), GO:0048522 (positive regulation of cellular process), GO:0050789 (regulation of biological process), …
Prl2c4	NM_011954	-1.78284	0.000986777	NA
Magea10	NM_001085506	-3.89962	0.00111173	GO:0008150 (biological_process)
Fosb	NM_008036	-1.52412	0.00206508	GO:0006139 (nucleobase-containing compound metabolic...), GO:0006351 (transcription, DNA-templated), GO:0006355 (regulation of transcription, DNA-templat...), GO:0006357 (regulation of transcription from RNA pol...), GO:0006366 (transcription from RNA polymerase II pro...), GO:0006725 (cellular aromatic compound metabolic pro...), GO:0006807 (nitrogen compound metabolic process), GO:0008150 (biol…
8430408G22Rik	NM_145980	-1.03489	0.00213938	GO:0008150 (biological_process)
Adamtsl3	NM_001190374	-1.43197	0.00273137	GO:0008150 (biological_process)
Has1	NM_008215	-1.45925	0.00699305	GO:0000271 (polysaccharide biosynthetic process), GO:0001667 (ameboidal-type cell migration), GO:0005975 (carbohydrate metabolic process), GO:0005976 (polysaccharide metabolic process), GO:0006022 (aminoglycan metabolic process), GO:0006023 (aminoglycan biosynthetic process), GO:0006024 (glycosaminoglycan biosynthetic process), GO:0006807 (nitrogen compound metabolic process), GO:0006928 (movemen…
Ngef	NM_019867	-1.66534	0.00958608	GO:0000902 (cell morphogenesis), GO:0000904 (cell morphogenesis involved in different...), GO:0007154 (cell communication), GO:0007165 (signal transduction), GO:0007166 (cell surface receptor signaling pathway), GO:0007167 (enzyme linked receptor protein signaling...), GO:0007169 (transmembrane receptor protein tyrosine ...), GO:0007264 (small GTPase mediated signal transductio...), GO:0007265 (R…

## Sheet: day7_Top100.DOWN.DEGs
Table S1g Genes significantly differentially downregulated between Vehicle and RXDX-106 treated MC83 mice at day 7. Statistical significance was defined as |log2FC|>1, FDR<0.01 and FPKM>1 in 2 or more samples within the contrasting groups. 4/13 (30.8%) genes significantly downregulated at day 7 annotate to an immunological GO term as indicated in the yellow cells.
SYMBOL	REFSEQ	logFC	FDR	GO.ID
Dynap	NM_029346	-2.55418	4.60031e-16	NA
Tnnt2	NM_011619	-1.67683	3.42734e-13	GO:0003007 (heart morphogenesis), GO:0003008 (system process), GO:0003012 (muscle system process), GO:0003013 (circulatory system process), GO:0003015 (heart process), GO:0003205 (cardiac chamber development), GO:0003206 (cardiac chamber morphogenesis), GO:0003208 (cardiac ventricle morphogenesis), GO:0003209 (cardiac atrium morphogenesis), GO:0003228 (atrial cardiac muscle tissue development), G…
Pls1	NM_001033210	-1.20562	5.63223e-10	GO:0003008 (system process), GO:0006810 (transport), GO:0006996 (organelle organization), GO:0007009 (plasma membrane organization), GO:0007010 (cytoskeleton organization), GO:0007015 (actin filament organization), GO:0007586 (digestion), GO:0008104 (protein localization), GO:0008150 (biological_process), GO:0008643 (carbohydrate transport), GO:0008645 (hexose transport), GO:0009987 (cellular pro…
Rab17	NM_008998	-1.59579	3.43972e-09	GO:0002251 (organ or tissue specific immune response), GO:0002376 (immune system process), GO:0002385 (mucosal immune response), GO:0006810 (transport), GO:0006955 (immune response), GO:0006996 (organelle organization), GO:0007275 (multicellular organism development), GO:0007399 (nervous system development), GO:0007416 (synapse assembly), GO:0008104 (protein localization), GO:0008150 (biological_…
Calr4	NM_001033226	-1.16217	2.7375e-07	GO:0008150 (biological_process)
1700012B09Rik	NM_029306	-2.84506	1.34142e-06	GO:0008150 (biological_process)
Agt	NM_007428	-1.18602	9.82048e-06	GO:0000003 (reproduction), GO:0000165 (MAPK cascade), GO:0001525 (angiogenesis), GO:0001542 (ovulation from ovarian follicle), GO:0001558 (regulation of cell growth), GO:0001568 (blood vessel development), GO:0001655 (urogenital system development), GO:0001657 (ureteric bud development), GO:0001658 (branching involved in ureteric bud morph...), GO:0001667 (ameboidal-type cell migration), GO:00017…
Adm2	NM_182928	-1.00365	6.36602e-05	GO:0001525 (angiogenesis), GO:0001568 (blood vessel development), GO:0001944 (vasculature development), GO:0003008 (system process), GO:0003013 (circulatory system process), GO:0006464 (cellular protein modification process), GO:0006468 (protein phosphorylation), GO:0006793 (phosphorus metabolic process), GO:0006796 (phosphate-containing compound metabolic ...), GO:0007154 (cell communication), G…
Slpi	NM_011414	-1.37209	7.48893e-05	GO:0002237 (response to molecule of bacterial origin), GO:0002376 (immune system process), GO:0006508 (proteolysis), GO:0006950 (response to stress), GO:0006952 (defense response), GO:0006955 (immune response), GO:0006959 (humoral immune response), GO:0008150 (biological_process), GO:0008152 (metabolic process), GO:0009605 (response to external stimulus), GO:0009607 (response to biotic stimulus),…
Vsig8	NM_177723	-1.38003	0.000223417	GO:0008150 (biological_process)
Glod5	NM_027227	-1.38438	0.000372479	GO:0008150 (biological_process)
Car9	NM_139305	-1.08642	0.00645871	GO:0002009 (morphogenesis of an epithelium), GO:0006730 (one-carbon metabolic process), GO:0006810 (transport), GO:0008150 (biological_process), GO:0008152 (metabolic process), GO:0009653 (anatomical structure morphogenesis), GO:0009888 (tissue development), GO:0009987 (cellular process), GO:0032502 (developmental process), GO:0044237 (cellular metabolic process), GO:0044281 (small molecule metab…
Gzme	NM_010373	-1.31151	0.00906023	GO:0002376 (immune system process), GO:0006508 (proteolysis), GO:0006955 (immune response), GO:0008150 (biological_process), GO:0008152 (metabolic process), GO:0009987 (cellular process), GO:0010467 (gene expression), GO:0016485 (protein processing), GO:0019538 (protein metabolic process), GO:0019835 (cytolysis), GO:0043170 (macromolecule metabolic process), GO:0044238 (primary metabolic process)…

## Sheet: day9_Top100.DOWN.DEGs
Table S1h. Genes significantly differentially downregulated between Vehicle and RXDX-106 treated MC83 mice at day 9. Statistical significance was defined as |log2FC|>1, FDR<0.01 and FPKM>1 in 2 or more samples within the contrasting groups. 5/20 (25%) genes significantly downregulated at day 9 annotate to an immunological GO term as indicated in the yellow cells.
SYMBOL	REFSEQ	logFC	FDR	GO.ID
Fam110c	NM_027828	-1.38855	5.11375e-09	GO:0006928 (movement of cell or subcellular componen...), GO:0007154 (cell communication), GO:0007165 (signal transduction), GO:0008150 (biological_process), GO:0009966 (regulation of signal transduction), GO:0009967 (positive regulation of signal transducti...), GO:0009987 (cellular process), GO:0010646 (regulation of cell communication), GO:0010647 (positive regulation of cell communicatio...),…
Dynap	NM_029346	-2.07869	3.56867e-08	NA
Pls1	NM_001033210	-1.19222	2.87213e-07	GO:0003008 (system process), GO:0006810 (transport), GO:0006996 (organelle organization), GO:0007009 (plasma membrane organization), GO:0007010 (cytoskeleton organization), GO:0007015 (actin filament organization), GO:0007586 (digestion), GO:0008104 (protein localization), GO:0008150 (biological_process), GO:0008643 (carbohydrate transport), GO:0008645 (hexose transport), GO:0009987 (cellular pro…
Prl2c3	NM_011118	-3.33688	2.19172e-06	GO:0008150 (biological_process), GO:0008283 (cell proliferation), GO:0008284 (positive regulation of cell proliferatio...), GO:0009987 (cellular process), GO:0042127 (regulation of cell proliferation), GO:0044699 (single-organism process), GO:0048518 (positive regulation of biological proces...), GO:0048522 (positive regulation of cellular process), GO:0050789 (regulation of biological process), …
Prl2c4	NM_011954	-3.33167	2.26312e-06	NA
Dusp4	NM_176933	-1.06327	2.58715e-06	GO:0000165 (MAPK cascade), GO:0000188 (inactivation of MAPK activity), GO:0001704 (formation of primary germ layer), GO:0001706 (endoderm formation), GO:0001932 (regulation of protein phosphorylation), GO:0001933 (negative regulation of protein phosphory...), GO:0006464 (cellular protein modification process), GO:0006468 (protein phosphorylation), GO:0006469 (negative regulation of protein kinase…
Vsig8	NM_177723	-1.92925	1.29878e-05	GO:0008150 (biological_process)
Ero1l	NM_015774	-1.25999	3.23202e-05	GO:0006082 (organic acid metabolic process), GO:0006457 (protein folding), GO:0006458 ('de novo' protein folding), GO:0006464 (cellular protein modification process), GO:0006520 (cellular amino acid metabolic process), GO:0006575 (cellular modified amino acid metabolic p...), GO:0006807 (nitrogen compound metabolic process), GO:0006810 (transport), GO:0006811 (ion transport), GO:0006812 (cation t…
Ndrg1	NM_008681	-1.03011	5.7868e-05	GO:0000075 (cell cycle checkpoint), GO:0001775 (cell activation), GO:0002274 (myeloid leukocyte activation), GO:0002376 (immune system process), GO:0007009 (plasma membrane organization), GO:0007049 (cell cycle), GO:0007272 (ensheathment of neurons), GO:0007275 (multicellular organism development), GO:0007399 (nervous system development), GO:0007422 (peripheral nervous system development), GO:000…
Slpi	NM_011414	-1.61528	8.3399e-05	GO:0002237 (response to molecule of bacterial origin), GO:0002376 (immune system process), GO:0006508 (proteolysis), GO:0006950 (response to stress), GO:0006952 (defense response), GO:0006955 (immune response), GO:0006959 (humoral immune response), GO:0008150 (biological_process), GO:0008152 (metabolic process), GO:0009605 (response to external stimulus), GO:0009607 (response to biotic stimulus),…
Gm5886	NM_001177652	-2.03999	0.000116096	NA
Gdf15	NM_011819	-1.25406	0.000124653	GO:0000165 (MAPK cascade), GO:0000768 (syncytium formation by plasma membrane f...), GO:0001932 (regulation of protein phosphorylation), GO:0001934 (positive regulation of protein phosphory...), GO:0006139 (nucleobase-containing compound metabolic...), GO:0006351 (transcription, DNA-templated), GO:0006355 (regulation of transcription, DNA-templat...), GO:0006357 (regulation of transcription from …
Tnnt2	NM_011619	-1.05917	0.000159969	GO:0003007 (heart morphogenesis), GO:0003008 (system process), GO:0003012 (muscle system process), GO:0003013 (circulatory system process), GO:0003015 (heart process), GO:0003205 (cardiac chamber development), GO:0003206 (cardiac chamber morphogenesis), GO:0003208 (cardiac ventricle morphogenesis), GO:0003209 (cardiac atrium morphogenesis), GO:0003228 (atrial cardiac muscle tissue development), G…
Bnip3	NM_009760	-1.08234	0.000274574	GO:0000266 (mitochondrial fission), GO:0000302 (response to reactive oxygen species), GO:0000422 (mitophagy), GO:0001666 (response to hypoxia), GO:0001836 (release of cytochrome c from mitochondri...), GO:0002252 (immune effector process), GO:0002376 (immune system process), GO:0006091 (generation of precursor metabolites and ...), GO:0006810 (transport), GO:0006839 (mitochondrial transport), GO:…
Slc22a23	NM_001033167	-1.02225	0.000685309	GO:0006810 (transport), GO:0006811 (ion transport), GO:0008150 (biological_process), GO:0051179 (localization), GO:0051234 (establishment of localization), GO:0055085 (transmembrane transport)
Gm1045	NM_001177577	-1.9984	0.000879253	GO:0008150 (biological_process)
Gzmg	NM_010375	-2.55302	0.000921212	GO:0002376 (immune system process), GO:0006508 (proteolysis), GO:0006955 (immune response), GO:0008150 (biological_process), GO:0008152 (metabolic process), GO:0009987 (cellular process), GO:0010467 (gene expression), GO:0016485 (protein processing), GO:0019538 (protein metabolic process), GO:0019835 (cytolysis), GO:0043170 (macromolecule metabolic process), GO:0044238 (primary metabolic process)…
Glod5	NM_027227	-1.47205	0.00147211	GO:0008150 (biological_process)
Gzmd	NM_010372	-1.76844	0.0018843	GO:0002376 (immune system process), GO:0006508 (proteolysis), GO:0006955 (immune response), GO:0008150 (biological_process), GO:0008152 (metabolic process), GO:0009987 (cellular process), GO:0010467 (gene expression), GO:0016485 (protein processing), GO:0019538 (protein metabolic process), GO:0019835 (cytolysis), GO:0043170 (macromolecule metabolic process), GO:0044238 (primary metabolic process)…
Gzme	NM_010373	-1.77073	0.00261347	GO:0002376 (immune system process), GO:0006508 (proteolysis), GO:0006955 (immune response), GO:0008150 (biological_process), GO:0008152 (metabolic process), GO:0009987 (cellular process), GO:0010467 (gene expression), GO:0016485 (protein processing), GO:0019538 (protein metabolic process), GO:0019835 (cytolysis), GO:0043170 (macromolecule metabolic process), GO:0044238 (primary metabolic process)…
